# Supplementary material
Source: publisher figshare collection journal article supplement (https://frontiersin.figshare.com/ndownloader/files/26574281)
Supplement: Supplementary file 1 [file 26574281]

## Sheet: Sheet1
	RiskShock	DemandShock	SupplyShock	ECO	ERIX	CNNE
2009-06-11	-0.569561	0.794273	1.14358	0.230783	2.8343	-0.441482
2009-06-12	0.681854	-0.779826	-0.192859	-0.989004	-1.87261	-2.32405
2009-06-15	9.6626	-2.34236	0.549168	-4.9937	-2.77003	0.908038
2009-06-16	7.31484	-0.0508525	0.226248	-1.64179	-1.04951	-0.156616
2009-06-17	-2.21468	-2.94187	3.17763	-1.91273	-4.12021	1.06079
2009-06-18	-4.31968	-0.778011	0.885874	-0.00975372	0.99953	0.877486
2009-06-19	-6.67412	0.224867	-3.16911	1.46214	1.13125	-0.77415
2009-06-22	10.8471	-3.24474	-0.457832	-6.52373	-7.26932	-0.729432
2009-06-23	-0.384901	-0.686984	3.9449	0.0307771	1.57935	0.0711191
2009-06-24	-4.45731	0.719028	-1.7123	3.28924	5.56929	2.40063
2009-06-25	-9.41449	-0.674957	2.27915	2.10183	-1.72017	-0.652414
2009-06-26	-1.84638	0.372642	-1.97628	0.417051	-1.42368	-0.0696356
2009-06-29	-1.93327	1.24086	2.12163	-1.0508	1.60124	0.923105
2009-06-30	4.15866	0.144964	-2.17064	-1.09162	0.109083	-1.58077
2009-07-01	0.297606	1.18602	-1.85243	0.699614	2.35106	0.612047
2009-07-02	6.89161	-2.40749	-1.35359	-1.83328	-2.7221	1.71102
2009-07-03	1.07799	-0.227787	0.239613	0	-1.63797	0.878862
2009-07-06	4.33994	-2.36736	-1.8374	-3.37671	-3.26007	-0.282297
2009-07-07	7.12869	-0.258569	-1.15724	-3.90263	-0.182233	1.23145
2009-07-08	2.68682	-1.50489	-3.10726	-2.52709	-1.51765	0.566544
2009-07-09	-4.04382	0.229384	0.00627393	-0.165609	3.05254	3.07715
2009-07-10	-2.21626	-1.64822	0.409993	-0.95482	-1.31306	-0.355737
2009-07-13	-9.33834	-0.135981	-0.760467	2.77245	1.97415	0.592038
2009-07-14	-5.2262	0.80638	-1.28924	0.346621	-2.16537	1.90095
2009-07-15	3.44756	3.77091	0.274886	4.98812	4.35874	1.40671
2009-07-16	-1.11753	0.536141	0.236536	1.9962	-0.347673	-1.20046
2009-07-17	-3.98805	1.09801	1.26789	-1.01349	0.831817	1.19393
2009-07-20	0.326343	2.21063	-1.2392	1.20489	2.26339	2.85215
2009-07-21	-1.79627	0.987164	0.183806	1.38926	0.691399	-3.24523
2009-07-22	-1.47754	-0.843055	1.66951	-0.427712	-1.86218	1.59651
2009-07-23	0.040644	2.1571	0.78764	3.93856	1.16717	1.14646
2009-07-24	-1.14179	0.446847	0.851427	3.04841	2.21926	-0.241384
2009-07-27	5.23745	1.33096	-0.381618	0.352603	1.11881	1.61966
2009-07-28	3.71471	-1.56522	-0.158834	-0.715783	-3.86505	1.79202
2009-07-29	3.0546	-1.71474	-4.31593	-2.06426	-4.86186	-5.5666
2009-07-30	-0.153429	1.44514	4.24505	2.70591	4.74393	1.0273
2009-07-31	2.44953	-0.126062	3.9105	-1.3532	1.14035	2.97721
2009-08-03	-0.755541	2.72411	0.620929	2.07362	2.58951	1.78135
2009-08-04	-2.26829	-0.368731	-0.0515419	0.321588	0.620591	1.07528
2009-08-05	0.278743	-0.707109	1.37357	-0.940099	-2.91528	-0.339903
2009-08-06	3.47128	-0.179996	0.291659	-1.87882	1.46277	-0.893921
2009-08-07	-2.90549	-0.907944	-0.814259	1.24714	-0.0750092	-4.60336
2009-08-10	1.10892	-0.0911865	-0.342346	1.13969	0.0498815	5.13716
2009-08-11	4.41543	-1.60841	-0.0284808	-3.7549	-0.768652	-2.7981
2009-08-12	-1.30859	0.707804	0.318456	0.315171	1.24266	-5.17529
2009-08-13	-2.60959	0.854699	-0.386363	-0.42045	2.36858	0.375788
2009-08-14	-1.59367	-0.849769	-3.73852	-1.77765	-1.50937	-3.70408
2009-08-17	14.1541	-1.71569	1.12239	-4.65896	-3.58401	-7.33321
2009-08-18	-4.7203	-0.0669628	3.36505	1.56047	-1.07605	1.9408
2009-08-19	0.437405	0.911402	3.78735	1.21916	-0.298414	-5.03475
2009-08-20	-4.04316	1.21016	-1.11876	0.811163	1.5891	4.09761
2009-08-21	-0.1992	2.42295	-0.265905	0.912084	1.58081	2.27792
2009-08-24	0.915589	1.44292	-0.5575	-0.69557	0.133239	1.90999
2009-08-25	-0.392609	-0.0345287	-3.1785	-0.858968	1.53088	-1.96682
2009-08-26	0.498052	-0.96336	-0.0252833	0.099108	-2.94881	4.22911
2009-08-27	-0.643324	-0.72089	2.0394	0.0990099	-1.42009	0.169483
2009-08-28	0.668946	0.685982	-0.224258	0.955343	1.54907	-2.59694
2009-08-31	5.37132	-0.950234	-2.79462	-2.30032	-1.59568	-8.20596
2009-09-01	12.2596	-0.317798	-1.82135	-3.41783	-0.753348	-0.76121
2009-09-02	0.670962	0.17503	-0.129414	0	-2.34823	1.29074
2009-09-03	-5.76001	-0.420174	-0.112579	2.15614	2.32943	5.03418
2009-09-04	-6.92489	-0.0382256	-0.28577	1.93146	1.62122	2.51644
2009-09-07	-0.0811568	0.884363	-0.781238	0	2.31015	0.910869
2009-09-08	1.83535	2.62929	2.25602	3.89831	2.42953	2.32026
2009-09-09	-4.62624	0.889863	-0.74704	0.868202	2.99192	0.61485
2009-09-10	-3.18513	0.147201	0.55689	2.14274	-0.0428035	-1.77123
2009-09-11	2.60691	0.418297	-3.98257	-0.531395	-1.46935	1.07304
2009-09-14	-0.656173	-0.488149	-0.256873	0.642909	0.293117	2.6599
2009-09-15	-1.56598	0.647319	2.3006	2.00448	1.51147	0.735707
2009-09-16	1.34791	1.64979	0.844699	1.80429	1.44875	-0.74511
2009-09-17	0.262774	0.255167	-0.27644	0.276774	-1.56346	2.77831
2009-09-18	1.48499	-0.217949	-0.341032	0.799223	1.14018	-3.45395
2009-09-21	1.03941	-0.928183	-2.44855	-1.01343	-1.77629	2.6722
2009-09-22	-3.72676	1.25271	1.30221	1.60429	2.42423	-1.98326
2009-09-23	1.78294	-0.921397	-2.79722	-1.42575	-0.830625	-2.94893
2009-09-24	6.48123	-1.2313	-3.16233	-3.04261	-3.92947	-1.4181
2009-09-25	3.49399	-0.0898068	0.454244	-0.285438	-0.268228	-1.48225
2009-09-28	-2.18973	1.01759	0.219926	1.95404	0.843635	-2.87057
2009-09-29	1.48203	-0.188557	0.0339796	-0.33513	-0.664226	-1.34385
2009-09-30	2.18431	0.0147891	5.77519	-1.03051	1.32558	1.06573
2009-10-09	-4.26223	0.369328	-0.462687	0.64873	-7.04994	4.98174
2009-10-12	-0.491521	1.29976	0.907203	1.24	0.266108	0.0725419
2009-10-13	0.167763	-0.0705595	1.24714	-0.64071	-0.942046	2.12623
2009-10-14	-0.26531	2.646	-0.925692	1.25946	2.37936	0.197596
2009-10-15	-4.85372	0.449954	2.46564	-0.0357654	0.113174	0.390078
2009-10-16	-1.4928	-0.320097	1.39123	-1.30521	-1.29961	0.0336563
2009-10-19	0.357674	1.97266	-0.325689	1.20679	0.614228	2.44561
2009-10-20	-2.56614	-1.16087	0.180742	-1.69725	1.20735	1.25599
2009-10-21	6.08745	1.12497	2.20149	-0.20051	1.16397	-1.2089
2009-10-22	-6.44824	-1.17847	0.411077	0.118532	-1.76403	-0.0396209
2009-10-23	7.02302	-0.0533071	-0.42894	-2.21126	0.0980037	1.47347
2009-10-26	9.52252	-0.0200393	-1.75007	-2.52844	-1.91035	0.686907
2009-10-27	3.18465	0.309039	0.996703	-1.01797	2.47973	-2.59201
2009-10-28	12.3278	-1.69952	-0.52464	-5.72038	-3.28006	1.6607
2009-10-29	-10.5014	0.531046	1.99928	3.65282	3.40629	-1.73987
2009-10-30	21.0985	-1.09189	-1.54978	-3.85745	-2.7282	0.979146
2009-11-02	-0.755382	0.525558	0.945941	-1.17442	-0.243305	2.66131
2009-11-03	-2.70162	-1.45933	2.94887	1.86845	-1.28819	2.38273
2009-11-04	-3.43767	0.881504	0.0321727	-1.22801	3.68625	0.38458
2009-11-05	-8.31321	0.969913	-2.2933	3.64963	2.05673	0.75331
2009-11-06	-5.17216	-1.119	-2.1358	-0.54751	-0.258647	0.650892
2009-11-09	-4.41004	2.39499	0.227186	2.64975	3.05554	1.32827
2009-11-10	-1.37169	0.0084544	-0.580901	-1.59721	-1.00256	-0.269578
2009-11-11	1.05132	0.0832189	0.261426	0.610539	0.66176	-0.153418
2009-11-12	5.44688	-0.854694	-1.97167	-2.74699	-0.683576	0.221505
2009-11-13	-2.93251	0.00577468	-0.956741	2.42249	-0.696374	1.52854
2009-11-16	-1.9347	2.20108	1.26836	3.49385	2.97336	2.47191
2009-11-17	-1.97789	-0.448072	0.560482	-0.715891	-1.86216	0.119519
2009-11-18	-3.43514	0.120281	0.240789	-0.0862523	1.72475	0.135735
2009-11-19	4.46879	-1.60347	-1.08752	-1.57514	-2.66073	0.927827
2009-11-20	-1.36953	-1.03601	-0.163744	-0.860809	-0.154796	-0.0953042
2009-11-23	-4.6152	1.82925	-0.759522	0.958161	3.63492	1.26865
2009-11-24	-3.4843	-0.873327	-1.46824	-0.958161	-0.826514	-4.92514
2009-11-25	-0.0855189	0.462212	2.10117	0.743862	0.31051	2.59591
2009-11-26	0.115353	-2.4822	2.12239	0	-2.64566	-4.39654
2009-11-27	19.0273	1.66444	-2.85569	-2.24839	0.3121	-2.11513
2009-11-30	0.855948	-0.857695	2.37274	0.804573	-0.146164	4.5117
2009-12-01	-10.723	1.62259	-0.614323	3.31791	1.62857	1.76097
2009-12-02	-4.28322	-0.632597	-1.99895	0.895585	0.155841	1.05894
2009-12-03	6.00404	-0.213789	0.322108	-0.437263	-0.616879	0.671358
2009-12-04	-4.84243	-0.715043	-0.978451	0.645715	-0.20913	-1.26244
2009-12-07	3.74251	-0.543823	-1.40042	1.80101	1.12947	0.826977
2009-12-08	7.45387	-1.43327	-0.153346	-0.83081	-2.74479	-0.778716
2009-12-09	-3.56607	-0.761278	-2.28551	0.486255	-2.33422	-1.24909
2009-12-10	-1.50459	0.0243185	-0.306583	-0.730272	-1.36249	0.443762
2009-12-11	-3.18899	-0.148295	-1.02338	0.00939629	-0.109245	-0.422364
2009-12-14	-2.09442	-0.137742	-0.533013	1.81561	-0.914641	-0.308482
2009-12-15	1.60969	0.0438275	1.71954	0.49701	-0.0448609	0.554021
2009-12-16	-4.21191	0.762665	1.83935	0.25674	0.0493055	-0.693819
2009-12-17	8.97584	-1.78956	2.01257	-1.45746	-3.33711	-2.40425
2009-12-18	-2.84052	-0.55674	1.27408	0.860439	-1.05621	-2.82087
2009-12-21	-5.64914	0.537239	-2.01722	2.54675	-0.322228	1.01784
2009-12-22	-5.03887	-0.280701	2.56887	0.582048	-0.445297	-2.48979
2009-12-23	0.550491	1.03195	2.13299	0.543165	-0.0868281	1.4711
2009-12-24	-1.11882	0.486362	1.28619	0.159716	0.157427	3.33318
2009-12-25	-0.033775	0.066458	-0.0758231	0	0	-0.0231442
2009-12-28	2.38085	0.750773	0.390471	-0.0620815	0.65512	1.14436
2009-12-29	0.657123	-0.0986444	0.231819	-0.596167	1.9168	-0.0991428
2009-12-30	-0.114134	-0.744164	1.13464	-0.0892857	0.678879	-0.0274094
2009-12-31	8.34191	0.909832	-0.227838	-0.537395	0.322132	0.315571
2010-01-04	-7.60196	1.17134	1.22171	2.80711	3.77924	0.64276
2010-01-05	-3.97064	0.223267	-0.113825	1.67125	0.676722	-0.248523
2010-01-06	-1.23845	0.0692034	1.56362	1.0677	-0.334443	-0.321459
2010-01-07	-0.589129	-0.299542	-0.419747	-0.127524	0.775638	-2.62567
2010-01-08	-5.02826	-0.48737	0.227536	0.652904	0.257085	-0.373498
2010-01-11	-3.67512	2.25847	-2.44264	0.286944	2.57312	-0.14058
2010-01-12	3.53933	-0.977823	-1.09607	-2.65589	-2.06984	2.06578
2010-01-13	-2.00261	-0.872697	-0.800909	-0.129898	0.993268	-1.81585
2010-01-14	-1.4648	-0.12513	-0.318774	-2.50956	1.05379	2.01751
2010-01-15	1.37247	-0.749663	-1.06176	-2.66538	-5.08426	0.96031
2010-01-18	0.0274909	0.597513	-0.528656	0	0.132184	0.750913
2010-01-19	-1.93078	-0.267021	1.40307	0.573276	-1.36415	-0.344331
2010-01-20	5.82764	-1.74128	0.0199455	-1.37039	-5.66138	-3.02448
2010-01-21	17.9937	-0.407383	-0.657278	-2.74169	-2.45306	0.159552
2010-01-22	21.9628	0.521962	-1.2732	-4.28844	-2.45987	-2.38302
2010-01-25	-5.0625	-0.854918	1.39387	0.65903	1.86711	-1.67789
2010-01-26	-3.37921	-1.31287	0.187385	-0.609698	-2.65944	-2.50886
2010-01-27	-5.7777	-1.3309	-0.600561	-0.653144	-3.23225	-1.22124
2010-01-28	2.39336	-0.600125	0.592883	-2.04621	-1.43199	1.12894
2010-01-29	4.19271	0.124722	-0.911519	-2.46217	1.92002	0.122155
2010-02-01	-7.90909	0.187946	1.46698	2.88688	0.305614	-2.25771
2010-02-02	-5.35396	0.572828	2.88234	1.23353	1.52794	-0.389259
2010-02-03	0.355694	-0.471076	0.083731	-0.57977	-0.78479	2.29101
2010-02-04	19.0725	-1.66788	-2.62655	-6.04367	-6.12198	0.489977
2010-02-05	1.98482	-1.81371	-1.04899	0.456889	-2.9288	-1.82166
2010-02-08	2.14	-0.280479	1.32318	-1.61371	-1.5969	-0.119925
2010-02-09	-1.28947	0.806528	1.77196	1.12487	5.85389	0.48832
2010-02-10	-1.96111	-0.525371	1.36278	0.042603	-4.90763	1.08639
2010-02-11	-5.54581	0.369566	0.367977	2.55467	-0.384264	0.220593
2010-02-12	-5.32685	-1.00151	-0.995772	0.723966	-1.60069	0.982611
2010-02-22	-0.549403	0.0264476	0.367094	1.13737	6.82001	0.173039
2010-02-23	6.9686	-0.510306	-0.820911	-2.56967	-3.4097	0.928834
2010-02-24	-4.5907	-0.282287	1.4024	-0.408527	-0.24067	2.04149
2010-02-25	-1.07189	-2.03709	-0.640994	0.366704	-4.74424	0.75632
2010-02-26	-3.01464	0.95933	0.877287	-0.534789	-0.332705	0.726
2010-03-01	-1.40884	0.643255	-1.8613	1.19149	-1.6363	0.88898
2010-03-02	-1.11462	0.857345	0.421312	1.17746	-0.13538	0.394452
2010-03-03	-1.27842	0.663948	0.823139	0.634598	5.98043	2.09191
2010-03-04	-0.679881	-0.375144	-0.552262	-0.183824	-2.48556	-3.28817
2010-03-05	-7.256	1.16099	0.172448	1.90347	1.7945	0.482904
2010-03-08	1.45683	0.420354	0.157026	-0.210833	0.614057	1.09259
2010-03-09	0.752001	-0.119425	-0.337084	-0.39273	-0.836616	-0.244144
2010-03-10	3.54584	1.20077	-0.115219	1.25334	1.67383	-1.6106
2010-03-11	-2.54553	-0.432064	0.235396	1.02107	-0.777433	-0.778011
2010-03-12	-2.94121	0.118572	-1.34957	0.265945	0.066831	-1.42048
2010-03-15	2.04545	-1.0757	-0.765789	-1.67638	-1.88424	-1.23934
2010-03-16	-1.65315	1.18596	1.22414	0.717635	1.94091	0.582834
2010-03-17	-4.72155	0.559478	0.730823	0.722382	0.901379	2.47861
2010-03-18	-2.23222	-0.861247	-0.286721	-1.27011	-0.650796	0.023089
2010-03-19	1.7389	-0.778453	-1.11649	-2.40537	0.0786826	0.826204
2010-03-22	-0.614954	-0.562245	1.13564	0.926545	-0.422889	0.769419
2010-03-23	-3.33587	-0.112063	0.7006	1.5487	1.29183	-0.644931
2010-03-24	6.63284	-0.38934	-0.908543	-0.660795	0.194738	0.667858
2010-03-25	5.11307	0.0127635	0.160913	-0.786612	3.10207	-1.79217
2010-03-26	-3.14318	-0.426081	-0.488083	1.06748	-0.472145	1.34205
2010-03-29	-1.33284	0.957882	1.76146	1.06612	-0.23545	1.14501
2010-03-30	-2.84681	0.0227697	0.0463733	0.40552	-1.75452	0.795273
2010-03-31	2.30365	0.836951	1.06725	-0.94214	1.70288	0.317534
2010-04-01	-0.615007	1.61141	-0.119477	0.377922	-0.469387	1.69896
2010-04-02	-0.15423	0.0566161	-0.0741514	0	0	0.204632
2010-04-06	-5.09985	0.135417	-0.166757	0.840216	1.27455	0.190987
2010-04-07	1.78485	-0.670764	-0.451604	0.989283	3.8607	0.441563
2010-04-08	-0.896753	-0.133892	-0.524486	-0.185357	-1.36026	-0.465216
2010-04-09	-2.34425	1.2775	-1.79843	-0.303164	1.18198	1.09161
2010-04-12	-3.92714	-0.0213738	-0.904989	0.293399	1.67206	0.529041
2010-04-13	3.3392	-0.537526	0.288664	0.0292926	0.368158	-1.09698
2010-04-14	-3.81227	0.859005	1.13772	1.8571	0.971261	0.782864
2010-04-15	1.35226	0.269483	-0.557372	1.37054	-0.265727	-0.728834
2010-04-16	14.3007	-0.558358	-1.42213	-2.55626	-1.26815	-0.0416661
2010-04-19	-4.70517	-1.10802	-1.50369	-0.769047	-2.1503	-4.66338
2010-04-20	-10.2094	0.631135	1.2917	2.06013	2.71246	0.524474
2010-04-21	2.67271	-0.234271	0.61024	-0.817037	-1.75921	3.3791
2010-04-22	0.902694	-1.19241	1.08244	0.95097	-2.77465	0.484053
2010-04-23	0.778006	1.22288	0.658606	0.837781	1.71628	-0.668871
2010-04-26	4.86324	0.680438	-1.41424	-0.589523	2.50119	0.630473
2010-04-27	26.9185	0.341124	-0.906157	-2.89286	-2.87234	-1.67153
2010-04-28	-5.63726	-0.94608	1.42023	0.029445	-4.5579	0.20705
2010-04-29	-13.6297	-0.697018	2.13053	2.74891	3.49326	-2.5979
2010-04-30	16.8498	0.925026	1.28152	-2.39625	-0.0795797	-2.07119
2010-05-04	16.1802	-1.90677	-1.55227	-2.70595	-6.37732	-0.493573
2010-05-05	5.91803	-1.14101	-2.10829	-2.46147	-3.80558	1.61301
2010-05-06	28.3554	-0.0597948	-2.0102	-5.34038	-3.12278	-2.36669
2010-05-07	25.0751	-0.649872	-0.674029	-2.26309	-3.37091	-1.84393
2010-05-10	-32.0942	1.12539	-0.566356	6.34963	6.97916	-1.72603
2010-05-11	-3.55219	-0.659676	-0.211569	-0.533223	-3.30865	-2.74607
2010-05-12	-10.0786	0.362658	-1.84334	3.07621	1.89255	-2.25538
2010-05-13	4.14784	-0.266057	-1.22075	-0.407457	-0.322835	3.37925
2010-05-14	16.588	-1.31049	-1.77865	-3.32084	-3.36436	0.318186
2010-05-17	0.661258	-0.809891	-1.44344	-1.13547	-2.93867	-5.99166
2010-05-18	9.18683	1.25753	-1.5405	-2.84697	2.32989	1.35438
2010-05-19	6.65253	-2.12443	2.84374	-2.04111	-2.70116	0.67437
2010-05-20	27.3619	-1.00156	-0.313293	-4.30519	-4.94246	-1.50795
2010-05-21	-9.97454	-0.173994	2.51204	2.00389	3.24896	2.49743
2010-05-24	-4.17404	-1.34181	1.14339	-2.039	-2.06379	4.09964
2010-05-25	-9.45749	-3.99836	0.784486	-1.4857	-5.50264	-0.637651
2010-05-26	1.36818	2.45021	1.89108	1.06346	3.65977	0.000675012
2010-05-27	-15.5439	2.28342	1.30903	5.75501	1.25443	2.11413
2010-05-28	7.26627	0.228154	-0.584624	-1.73489	0.0775462	0.0136574
2010-05-31	1.30508	0.612895	-0.469913	0	0.0697402	-3.2858
2010-06-01	11.1421	-0.957062	-0.463954	-2.45741	-0.605438	-1.38346
2010-06-02	-14.6429	-0.446073	-0.0732679	2.79555	-1.90581	1.09237
2010-06-03	-2.77017	0.878716	1.44563	1.00762	1.99449	-1.0926
2010-06-04	19.0401	-0.688887	-2.59622	-4.72152	-2.91154	0.347895
2010-06-07	5.34027	-0.838046	0.906084	-3.27626	-3.19094	-0.797108
2010-06-08	-6.81843	-0.922612	1.15877	-0.970057	-1.08432	0.568001
2010-06-09	0.434157	0.754922	2.62499	-0.0609422	2.20109	2.28107
2010-06-10	-8.95904	0.83795	0.226661	4.49393	2.92276	-0.315498
2010-06-11	-5.95228	-0.0181406	-2.6145	1.45802	2.97458	-0.222666
2010-06-17	-2.95301	-0.142451	-1.20022	5.17125	3.75442	-0.803352
2010-06-18	-4.29284	-0.0321853	0.275635	0.174387	-0.0297299	-4.12984
2010-06-21	3.84395	1.32398	-0.112068	-0.951919	1.6261	2.03425
2010-06-22	9.04806	-1.29103	0.815112	-1.94267	-2.19495	0.268288
2010-06-23	0.669556	-1.38276	0.08887	0.134424	-0.969664	-0.842679
2010-06-24	10.5666	-0.755056	1.43643	-2.52805	-1.63631	-0.0286186
2010-06-25	-2.71632	-1.30694	3.97838	1.68492	-2.36216	-1.25243
2010-06-28	2.03788	0.538033	-1.14085	-0.50931	-0.15847	-1.22189
2010-06-29	17.064	-1.71239	-0.580935	-4.96643	-5.32258	-5.16759
2010-06-30	3.3074	0.141612	-0.361258	-0.0835073	0.804989	-1.55479
2010-07-01	-3.86343	-1.65937	-2.41656	0.571226	-0.193343	-1.21991
2010-07-02	-8.18165	0.459033	-1.98861	0.248889	3.64413	-0.554035
2010-07-05	0.0822479	-0.440189	0.366024	0	-0.878751	-0.800688
2010-07-06	-0.885047	2.26729	-2.23676	0.601878	5.20365	2.51623
2010-07-07	-9.3629	0.439773	1.94019	3.45759	1.16445	1.37486
2010-07-08	-4.47301	0.703021	0.959906	1.74642	1.56412	-0.162849
2010-07-09	-2.75634	0.230181	0.488079	1.83715	-0.210608	2.85391
2010-07-12	-2.0183	0.468838	-2.04289	-1.80365	-1.26842	1.06381
2010-07-13	0.760527	1.74579	1.41907	1.97895	1.38262	-0.362752
2010-07-14	1.7758	-0.0291916	-0.0343986	0.55674	0.499257	0.622311
2010-07-15	1.53426	-0.0126803	-0.466171	-0.622443	3.09967	-2.72235
2010-07-16	4.85225	-0.992113	0.309584	-3.25087	0.21942	2.99145
2010-07-19	-0.234917	-0.297726	0.920612	1.04689	-1.08973	2.24944
2010-07-20	-7.7317	-0.351454	1.01866	1.59968	-0.858341	2.96421
2010-07-21	6.68328	0.916132	-1.5704	-1.00793	0.133221	1.52144
2010-07-22	-3.08135	1.73388	1.83621	3.51105	3.74347	1.20838
2010-07-23	-4.66046	-0.218267	-0.49613	2.03209	-0.122928	-0.219032
2010-07-26	-3.22571	1.05451	-1.10454	2.15667	1.32214	1.32905
2010-07-27	2.04018	0.490708	-2.2152	-1.72579	0.0979145	-0.624418
2010-07-28	4.92106	5.02936e-06	-0.399887	-1.46836	-0.691173	2.10735
2010-07-29	0.231388	0.27798	1.52118	-0.812057	0.992297	0.890814
2010-07-30	-2.26886	-0.817652	1.30803	-0.419288	-4.37699	-0.146326
2010-08-02	-6.39525	2.77527	0.220765	1.43333	2.66659	1.77609
2010-08-03	2.53565	0.882117	0.844709	-0.43638	-0.38644	-2.85735
2010-08-04	-1.42106	0.130985	-0.306361	0.680347	0.754733	1.14468
2010-08-05	-0.361259	0.0479136	-0.637675	0.654701	-0.0118246	-0.0949273
2010-08-06	-1.43669	-0.552294	-1.23347	-0.0210526	1.51871	1.95753
2010-08-09	1.92625	0.804461	0.362382	1.22418	1.01553	0.852862
2010-08-10	1.40938	-1.62852	-0.0592935	-1.69904	-2.91175	-3.19995
2010-08-11	13.0165	-1.65123	-0.683085	-5.64618	-4.52796	0.928597
2010-08-12	2.71747	-0.0961158	-2.74705	-0.752686	1.06747	-1.05282
2010-08-13	2.61477	0.132544	-0.446605	-1.09985	-0.154836	1.75545
2010-08-16	0.138038	0.196117	-0.376713	1.28011	0.18276	2.41709
2010-08-17	-6.53873	0.612276	-0.209237	1.84023	2.93224	1.20023
2010-08-18	0.955643	-0.91692	0.361832	0.573004	-12.1372	0.680433
2010-08-19	7.71098	-0.813711	-0.2047	-3.34053	-1.41378	0.343611
2010-08-20	-2.60179	-1.31831	-0.342471	-0.867189	-3.95305	-1.57291
2010-08-23	0.913438	0.432563	-0.828297	-0.759235	0.384266	1.1966
2010-08-24	7.29561	-1.06093	-0.725785	-2.23023	-2.33926	0.632734
2010-08-25	-1.72477	-0.805204	1.81271	1.04541	-3.32803	-2.00956
2010-08-26	2.8587	0.993923	0.441858	-0.856662	3.03446	0.271977
2010-08-27	-10.5296	0.0473386	1.78677	3.38348	-0.281843	0.531195
2010-08-30	10.3029	0.234783	-0.265454	-1.65426	-1.10322	3.35055
2010-08-31	-3.06773	-0.41957	-3.62168	0.219844	0.0408547	0.511619
2010-09-01	-8.40964	2.44185	0.14084	3.72094	2.92259	-1.82777
2010-09-02	-3.24477	-0.014143	1.30323	1.57988	-0.184212	2.65174
2010-09-03	-8.39015	0.483015	-1.46582	1.74938	-0.0260644	1.90982
2010-09-06	-0.435385	0.368648	-0.358086	0	-0.222475	-0.667648
2010-09-07	11.1983	-0.321609	0.204254	-1.39923	-2.65604	0.88992
2010-09-08	-1.17789	0.547558	0.226156	0.674943	-0.138937	2.10877
2010-09-09	-1.69111	0.411091	-1.02934	-0.195482	-1.25716	-0.706314
2010-09-10	-3.50696	-0.35832	3.01344	-0.381202	-0.27789	0.703287
2010-09-13	-3.64353	0.727928	0.11582	1.4409	2.87075	1.77053
2010-09-14	1.54223	-0.0338003	-0.40744	0.664668	3.28503	0.976507
2010-09-15	2.783	-0.290985	-0.630871	-0.54642	-1.61892	-2.73171
2010-09-16	-1.29838	-0.336936	-1.72627	0.268226	-0.452719	-1.85149
2010-09-17	1.43818	-0.38182	-0.835591	-0.300462	-1.22333	-0.870793
2010-09-20	-2.01281	1.23313	0.426284	2.20023	-0.595651	-1.26829
2010-09-21	3.92206	0.0758692	-1.66732	-0.527038	-0.993746	-0.13653
2010-09-27	3.32183	0.438419	-0.167197	2.08134	0.897685	2.91893
2010-09-28	0.769972	0.307449	-0.682931	1.16286	0.582952	-1.17546
2010-09-29	3.15656	1.05429	1.43647	1.37176	-0.736576	-0.570252
2010-09-30	2.45404	0.450641	2.40813	0.744021	2.08896	2.0308
2010-10-08	-3.79662	0.00671691	0.968473	0.877636	1.1779	2.74444
2010-10-11	-8.96883	-0.623516	-0.532145	1.61532	0.00776317	1.74625
2010-10-12	-0.805776	-0.77751	-0.0531874	0.204968	-1.45442	2.20496
2010-10-13	0.685169	1.33232	0.50447	2.23688	2.08253	1.4809
2010-10-14	4.22803	0.674013	-0.744032	0.646267	2.81368	-1.52359
2010-10-15	-3.98155	-1.01396	-1.12667	-1.50809	-0.462959	2.15026
2010-10-18	0.0381039	0.529347	1.75783	0.527554	-0.340913	-3.09201
2010-10-19	7.78054	-1.32618	-2.8564	-3.80237	-2.26663	3.77332
2010-10-20	-3.45472	0.438359	2.23988	0.949468	-0.0606022	0.422996
2010-10-21	-2.84397	-0.152084	-1.53715	-0.850144	0.454907	0.952057
2010-10-22	-2.75086	-0.276426	1.45868	0.682664	-0.515546	1.3106
2010-10-25	5.33543	0.809625	0.598973	1.27365	0.0109693	3.04318
2010-10-26	2.31396	0.47799	-0.260829	0.485579	-4.11014	1.07844
2010-10-27	2.66704	-1.141	0.372063	0.145215	-1.49214	-2.05001
2010-10-28	1.15073	0.946841	-0.473064	-1.11874	0.778986	0.0635652
2010-10-29	1.75495	0.590735	-1.34235	-0.716708	0.366993	1.39239
2010-11-01	3.22875	0.724388	1.39207	-1.31914	-1.43163	3.77308
2010-11-02	-0.747326	1.00054	0.220184	2.18248	1.12353	-1.05675
2010-11-03	-9.63953	-0.87486	1.12911	0.516394	1.16591	-3.29145
2010-11-04	-6.11487	2.00771	0.0168624	2.74147	1.86928	2.68802
2010-11-05	-1.88626	-0.309909	0.558581	0.565719	-2.36882	0.81935
2010-11-08	-0.0189941	-0.0362888	0.254794	0.814649	-0.633882	1.40216
2010-11-09	4.18465	0.785762	-0.84755	-1.78778	1.03171	-0.247684
2010-11-10	-2.92389	-1.14155	2.0484	0.189699	-3.70334	0.479478
2010-11-11	0.673631	0.00071835	0.0205049	-1.0574	-2.99309	-0.822993
2010-11-12	10.081	-0.614871	-2.31441	-2.68857	-1.39497	-7.10238
2010-11-15	-1.14002	-0.455411	0.286694	0.0590087	-0.532826	1.78557
2010-11-16	11.1563	-1.62191	-1.00948	-3.62402	-2.25865	-4.77099
2010-11-17	-2.61843	-0.0284859	-2.47437	-1.34451	0.931041	-3.27331
2010-11-18	-14.8702	0.320312	0.608086	2.06572	1.91777	2.06907
2010-11-19	-4.95616	-0.689083	-0.120171	0.856644	-0.674859	2.26673
2010-11-22	1.38708	-0.888363	1.10637	0.320609	-2.88041	0.655234
2010-11-23	11.6681	-0.912913	0.823494	-1.28865	-1.54329	-2.41324
2010-11-24	-4.33892	0.84606	2.17365	2.36318	-0.49291	2.97944
2010-11-25	-0.262991	-0.058855	0.0189357	0	0.493673	0.842486
2010-11-26	12.7862	-0.0797264	0.652543	-0.964558	-1.64117	-0.862543
2010-11-29	-1.97779	-1.34153	3.34915	-0.500852	-4.15356	-0.417006
2010-11-30	8.97469	0.686203	-2.00865	-2.19298	-0.136823	-1.86478
2010-12-01	-8.73681	1.63379	1.17782	2.04224	0.792425	-0.0694159
2010-12-02	-10.1336	0.833175	0.127181	1.42795	2.19256	0.449391
2010-12-03	-8.08323	0.124835	0.763848	1.43717	0.631782	-0.217845
2010-12-06	-0.601663	0.718568	-0.455302	1.53237	-1.17267	-1.44424
2010-12-07	-0.27487	0.762388	-1.46233	-0.434049	1.39667	1.04983
2010-12-08	-1.48613	-0.696454	0.0345134	0.501399	-0.660967	-0.210974
2010-12-09	-2.99677	-0.097797	0.000312313	0.35524	1.23701	-2.00511
2010-12-10	1.71836	0.467179	-0.979931	1.27609	3.54999	1.45719
2010-12-13	-0.312991	1.36797	-0.280104	-0.78849	2.04597	3.93474
2010-12-14	0.215827	0.235499	-0.580119	-0.948692	2.01429	0.99257
2010-12-15	1.77482	-0.612308	0.993641	-0.511609	-0.749164	-0.519673
2010-12-16	-3.05435	-0.716706	-0.616626	0.309209	-0.839446	-0.909702
2010-12-17	-7.98512	-0.776102	0.564466	0.2024	-0.513673	0.589178
2010-12-20	1.03322	0.111261	0.8393	0.153935	-2.63582	-0.810593
2010-12-21	0.361969	1.04377	0.237601	1.19453	2.65416	1.26935
2010-12-22	-6.68098	-0.280716	0.580185	0.700495	-1.34763	-0.859842
2010-12-23	5.61612	0.806619	0.738399	-0.0660533	-0.806892	-2.12673
2010-12-24	0.216699	0.18885	-0.166875	0	0.322493	-1.76782
2010-12-27	6.8539	0.409848	-0.541795	-0.170052	-0.61671	-2.84431
2010-12-28	-0.443034	0.221635	0.304814	-0.521402	-0.563828	-2.55497
2010-12-29	-1.51681	0.510824	-0.946391	0.351061	0.941199	1.37547
2010-12-30	1.14316	0.256763	-1.58774	-0.0663224	0.354316	0.264067
2010-12-31	1.28297	0.369903	1.43725	-0.00947822	0.962403	3.15472
2011-01-04	-1.4697	0.325081	-2.77774	1.85008	1.45924	1.80837
2011-01-05	-2.31745	-0.481268	1.29021	0.898529	-2.57846	0.0598064
2011-01-06	1.89127	-0.396786	-1.71855	-0.480681	-1.4984	-0.257735
2011-01-07	-1.48197	-0.0979981	-0.412895	0.0185305	-1.87691	-1.01968
2011-01-10	2.06147	-0.316572	1.74767	1.16971	-1.04904	-2.33671
2011-01-11	-3.72856	1.04691	0.936281	0.611623	1.28685	-0.639952
2011-01-12	-4.3558	1.77759	-0.969657	1.55322	2.03282	0.612378
2011-01-13	0.385121	0.464118	-0.89592	-0.548094	1.4151	-0.151705
2011-01-14	-6.01514	-0.371613	0.116726	-0.297767	0.646088	-2.56334
2011-01-17	-0.727315	0.0956195	-0.139942	0	-0.227511	-3.61467
2011-01-18	2.27753	1.26426	-1.14974	1.64019	4.54264	0.196827
2011-01-19	8.60361	0.348885	-0.402666	-3.27098	0.840139	2.82862
2011-01-20	4.36096	-1.2696	-0.906124	-1.17339	-2.54911	-3.87784
2011-01-21	2.88608	1.59422	-0.943078	-0.690108	3.98213	1.63376
2011-01-24	-4.35812	-0.339896	-1.37156	1.90023	2.36217	-1.93538
2011-01-25	-0.754099	-0.59661	-1.47711	-1.49864	-1.55871	-1.53114
2011-01-26	-5.70659	0.695937	0.377796	0.779876	-0.855453	1.7128
2011-01-27	-3.58686	0.113242	-2.2703	0.230936	0.437271	2.59499
2011-01-28	21.095	0.881906	4.6433	-3.07313	-2.02663	1.03772
2011-01-31	-0.942297	1.18128	2.05538	0.758297	0.75729	1.28214
2011-02-01	-10.2514	1.96757	-3.83705	2.48078	1.04125	0.243198
2011-02-09	-0.0971173	-1.08233	0.642748	1.36318	1.37032	-1.20387
2011-02-10	1.121	-0.411342	0.422809	0.217845	-2.50461	2.85874
2011-02-11	-2.66395	0.0420581	-1.53783	1.22557	-1.18341	0.882024
2011-02-14	1.18317	0.779741	-1.52395	1.02474	0.438813	1.98143
2011-02-15	2.44451	0.102448	-0.546595	-0.640344	0.628358	0.510387
2011-02-16	2.09102	0.874541	0.140999	1.61958	0.666204	1.84171
2011-02-17	-0.800237	0.248377	1.3238	0.481675	0.521339	1.0741
2011-02-18	-1.21196	0.448716	-0.656063	-0.789409	1.47357	-1.08802
2011-02-21	-0.287073	0.0852613	-0.106246	0	-0.40266	1.98025
2011-02-22	23.3651	2.45141	7.39691	-3.64068	0.318024	-2.44266
2011-02-23	8.05403	1.86474	3.56238	-2.06688	-1.61143	0.51588
2011-02-24	-2.90468	0.0332996	-1.04843	1.98465	1.25093	0.289338
2011-02-25	-10.4022	-0.634356	0.557201	0.828294	2.30665	0.151371
2011-02-28	-5.36485	0.410412	-1.60568	-1.15787	1.56082	1.09995
2011-03-01	13.106	0.593146	2.91791	-2.5165	-1.30333	0.397753
2011-03-02	-0.36759	0.501777	2.10753	0.394182	-0.756977	-0.762777
2011-03-03	-10.587	-0.0436122	-0.889168	1.11775	0.0820759	-1.35419
2011-03-04	1.64923	0.529592	2.05416	-1.11775	0.0853681	1.27025
2011-03-07	8.19888	0.547133	0.946965	-2.19706	-0.237463	2.08569
2011-03-08	-3.4158	-0.970551	0.225561	0.943448	-0.837968	0.361785
2011-03-09	1.82188	-0.721068	0.0940683	-0.857311	1.46438	-0.0403181
2011-03-10	8.12662	-2.18964	0.699653	-3.38587	-2.80655	-1.51595
2011-03-11	-7.77187	-0.536649	-1.50435	-0.735005	-1.49869	-0.445458
2011-03-14	4.62055	0.784483	-0.400947	0.942608	10.6343	0.00355395
2011-03-15	14.566	-0.388939	-2.90572	1.61634	5.04005	-0.138189
2011-03-16	20.4078	1.11252	0.996605	-1.40916	-5.60644	2.20402
2011-03-17	-8.73511	1.54314	1.616	0.980688	4.75456	-1.72069
2011-03-18	-7.75193	-0.732266	-0.169975	-0.342148	1.15131	0.793879
2011-03-21	-17.2341	0.0725628	0.189082	1.68952	-0.359185	-0.812263
2011-03-22	-3.09169	0.0620571	1.37452	-0.0866927	-0.909679	-0.330147
2011-03-23	-5.40725	-0.270125	1.5794	0.192548	2.02004	0.939585
2011-03-24	-6.66798	0.167738	-0.678456	1.02388	0.980582	-0.207774
2011-03-25	-1.05555	0.305213	-0.528087	0.39905	0.835898	0.922445
2011-03-28	8.04697	0.144875	-1.04446	0.52017	5.21651	0.102821
2011-03-29	-6.17565	-0.900908	1.18538	2.06328	-1.54022	-1.95426
2011-03-30	-3.01457	0.646375	-1.23945	0.43336	1.09735	-0.331725
2011-03-31	-0.140965	0.116593	2.19755	0.211387	1.18722	-1.09157
2011-04-01	-2.03241	1.04707	0.105751	-0.681716	-1.1518	1.03763
2011-04-06	-2.289	0.0280331	0.281427	-0.872719	-0.52751	0.452631
2011-04-07	0.909916	-0.35535	1.68144	-0.617344	-2.61444	0.19824
2011-04-08	4.27328	1.50257	1.16523	-1.59837	0.401668	1.65364
2011-04-11	-7.19556	-1.53337	-1.68212	-1.11208	0.110247	-0.737144
2011-04-12	2.25796	-2.9608	-0.741515	-2.07478	-1.48428	-0.460565
2011-04-13	-0.975392	-0.0542473	0.781005	0.324277	0.951812	0.43643
2011-04-14	-4.14442	-1.10446	1.62799	0.303669	-1.86389	-0.567159
2011-04-15	-6.5325	-0.100448	1.12509	0.0977613	-1.83943	-0.255548
2011-04-18	9.39142	-2.11604	-0.0132403	-1.98359	-4.6259	-0.313998
2011-04-19	-6.35923	0.817109	-0.120118	-0.619878	0.906303	-2.03726
2011-04-20	-5.63827	2.3891	0.618575	2.14315	0.463252	0.986217
2011-04-21	-3.2907	0.452201	0.160176	0.421218	0.152923	0.555784
2011-04-22	-0.601889	0.00511514	-0.0551159	0	0	-0.2752
2011-04-25	6.68934	0.132758	0.236983	0.0195484	-0.091114	-2.3618
2011-04-26	-0.723456	0.531397	-0.57651	0.506923	0.875288	-0.720333
2011-04-27	-2.06835	-0.0746579	0.419782	0.455979	-0.987307	-1.42174
2011-04-28	-5.32103	-0.146725	-0.101813	0.0193573	1.29249	-2.92824
2011-04-29	0.127692	0.557398	0.455066	1.59374	2.16032	2.56585
2011-05-03	4.67289	-1.83415	-0.377565	-3.11497	-1.48665	1.10594
2011-05-04	2.41768	-1.42311	-0.301231	-2.58798	-4.50369	-2.65452
2011-05-05	6.38651	-2.22224	-6.78566	-0.576429	-2.08846	-0.405414
2011-05-06	1.51106	0.739715	-3.2276	1.15958	-1.71646	1.05654
2011-05-09	-6.90013	-1.0239	5.85283	0.759017	-1.60708	0.886146
2011-05-10	-8.20401	0.145098	0.685014	0.486329	1.4706	0.898988
2011-05-11	5.48598	-1.13615	-4.34448	-2.73	-0.281384	-0.578397
2011-05-12	-5.33171	-2.22712	2.36729	1.14322	-1.37639	-1.67223
2011-05-13	5.66138	-0.157377	1.122	-1.71465	0.423644	0.757173
2011-05-16	6.90141	0.232544	-2.14249	-1.8696	-0.569916	-0.411387
2011-05-17	-3.39724	-0.78868	-0.00407643	-0.900718	-0.641462	-0.540169
2011-05-18	-8.17069	0.686358	2.17195	1.7934	1.126	0.542525
2011-05-19	-5.28785	-0.00611435	-1.98165	-0.124082	0.584944	-0.631652
2011-05-20	10.9379	0.173135	1.51149	-1.35419	-0.62733	-0.217593
2011-05-23	5.39559	-1.93509	0.13416	-2.72155	-3.52659	-3.60977
2011-05-24	-2.14277	1.05348	0.873353	-0.442837	-1.45429	0.717557
2011-05-25	-4.53725	0.069297	1.39029	0.872991	-0.398353	-1.36152
2011-05-26	-6.38767	0.129787	-1.56974	0.854797	-2.26302	-0.952026
2011-05-27	-1.38262	1.20703	-0.773252	0.931914	0.0214486	-2.07447
2011-05-30	-0.339895	-0.0288358	-0.0111885	0	4.4162	-1.38575
2011-05-31	-3.6364	1.17706	0.842955	2.35428	2.71786	2.19147
2011-06-01	16.3752	0.159216	-1.6059	-3.62723	-1.81294	1.05715
2011-06-02	0.00372753	-1.09866	1.03698	0.245242	-0.58396	-1.12424
2011-06-03	-0.835186	-0.389009	0.0909325	-1.26462	1.15375	1.5151
2011-06-07	-2.11693	0.452416	-0.444005	-1.56525	-0.477644	1.14581
2011-06-08	3.69193	0.346322	1.54501	-2.76577	-3.01873	0.522958
2011-06-09	-5.31426	0.313612	0.588737	-0.0112632	0.165281	-2.22838
2011-06-10	5.47938	-1.19871	-1.30241	-1.48655	-1.53353	-0.254242
2011-06-13	4.30305	0.00936564	-1.80709	-0.160183	-0.581193	0.261585
2011-06-14	-6.75883	0.683552	1.12031	2.37621	3.45061	1.49079
2011-06-15	14.9531	-0.670009	-3.29645	-2.31898	-3.79138	-1.1251
2011-06-16	7.67948	0.0437059	0.525727	-1.32483	-3.47539	-1.85276
2011-06-17	-3.1129	-0.226013	-2.0623	0.0811453	0.696292	-0.437327
2011-06-20	-8.90931	-1.13938	0.728756	0.0579207	-2.39196	-1.04332
2011-06-21	-6.38514	1.12582	-1.19377	1.68805	0.41576	1.38156
2011-06-22	-2.28502	-0.442498	2.36388	0.601693	-0.561761	-0.096831
2011-06-23	3.88172	-2.19691	-2.62101	0.586843	-4.39558	1.9595
2011-06-24	9.28771	0.320824	0.384349	-0.722759	-1.35087	2.55158
2011-06-27	-1.7472	0.468271	-1.12273	0.452336	0.367055	1.12092
2011-06-28	-7.00081	0.882706	1.31558	1.32259	0.0929431	0.274341
2011-06-29	-10.9248	0.338643	1.08057	-0.0556886	2.29904	-1.19466
2011-06-30	-5.36618	1.29171	-0.745375	1.78872	2.20867	1.36919
2011-07-01	-4.59761	0.296722	-1.03503	1.07756	2.07846	0.691768
2011-07-04	-0.585462	0.316652	-0.321864	0	1.34833	3.09246
2011-07-05	0.898595	-0.161013	2.20526	-1.34055	-1.3015	0.524395
2011-07-06	1.56292	-0.652505	0.383834	-0.351726	-3.22505	0.276626
2011-07-07	-2.50748	1.20589	0.874317	0.724084	1.05802	-0.820608
2011-07-08	-0.425033	-1.07115	-1.65558	-0.845276	-1.94368	-0.314631
2011-07-11	13.9624	-0.823664	0.379822	-2.93086	-3.52777	0.535919
2011-07-12	8.72866	0.228379	2.64655	-1.2221	-0.895061	-1.91595
2011-07-13	0.918306	1.50941	-0.627649	0.9379	2.22162	2.09649
2011-07-14	4.521	-0.282622	-1.95572	-1.91949	-0.943917	0.764363
2011-07-15	-5.82478	-0.16529	1.40395	0.463125	-1.14184	0.267364
2011-07-18	6.64461	-0.641093	-0.448076	-2.17197	-3.8967	0.0114099
2011-07-19	-8.02941	0.654479	0.591959	2.20662	0.885905	-0.765057
2011-07-20	-1.18621	0.0923496	0.491285	0.150003	1.24237	-0.360235
2011-07-21	-8.42143	1.09754	-0.430455	1.49914	4.34842	-1.53568
2011-07-22	-0.946737	0.270785	0.440919	0.791949	-0.219974	0.176859
2011-07-25	9.76055	0.891083	-0.905815	-1.35007	0.386799	-3.97852
2011-07-26	5.20172	0.799917	-0.0187517	-0.37764	-0.202272	0.487333
2011-07-27	13.2306	-0.40711	-1.14537	-3.9762	-3.45625	1.19414
2011-07-28	4.51186	-0.199441	0.449728	-0.107431	-1.89608	-0.413289
2011-07-29	6.8331	-0.317015	-1.16142	0	0.157797	-1.05215
2011-08-01	-5.57782	-0.985263	-0.334445	-0.083637	-2.34932	0.766652
2011-08-02	4.58798	-1.17731	0.0871345	-4.53595	-3.68193	-0.640427
2011-08-03	-5.1209	-2.58486	-0.0874184	0.16247	-1.13645	-0.153134
2011-08-04	30.256	-2.03832	-2.49945	-8.43811	-3.95531	0.342918
2011-08-05	4.03886	-1.35937	1.66681	-1.8928	0.249184	-2.66354
2011-08-08	41.612	-1.96658	-2.60924	-10.2104	-5.73364	-5.04746
2011-08-09	-27.0072	-1.87205	-2.4326	8.23874	3.77164	-0.244332
2011-08-10	19.3142	-0.96475	6.32759	-3.79956	-2.04267	1.04963
2011-08-11	-7.12739	2.41117	0.86722	6.36488	0.50046	1.14749
2011-08-12	-6.47463	1.31208	-1.90628	0.165039	4.13044	0.921628
2011-08-15	-12.6998	1.87686	0.541307	3.72261	3.26783	1.56022
2011-08-16	2.8619	-0.424503	-0.900414	-3.02422	-2.8403	-0.872343
2011-08-17	-2.92548	0.625078	0.348899	-1.67886	6.31288	-0.547616
2011-08-18	30.6333	-1.98035	-2.71089	-7.17623	-6.85448	-1.79116
2011-08-19	4.31822	-0.621137	0.614312	-3.08881	0.162788	-1.53644
2011-08-22	0.0894874	0.254568	2.00543	-0.617	0.128571	-0.95549
2011-08-23	-14.524	0.898135	-0.0495542	6.52829	-0.089064	1.67498
2011-08-24	-1.13802	0.480656	-0.822152	0.736519	1.35308	-0.272065
2011-08-25	11.0656	-1.08419	1.70224	-1.8589	-1.35951	2.5415
2011-08-26	-9.18419	-0.271333	-0.218956	2.96072	0.231233	0.335939
2011-08-29	-9.51061	2.0476	-0.110601	4.34427	3.20276	-1.30785
2011-08-30	1.95752	0.62097	1.41044	0.231371	-1.3548	-0.891212
2011-08-31	-2.98508	1.18097	-1.30094	-0.736802	1.8948	-0.529617
2011-09-01	1.16404	-0.394465	0.522698	-2.9604	-1.54093	-0.656347
2011-09-02	7.23763	-1.88868	-0.814736	-3.94182	-3.87094	-0.876792
2011-09-05	1.3844	-2.52051	2.22679	0	-4.57849	-2.32322
2011-09-06	9.64689	0.549019	-0.443819	-1.16598	-2.7888	-0.825304
2011-09-07	-8.609	2.26445	1.33961	4.15818	2.18502	2.50272
2011-09-08	2.97728	0.543611	-0.641328	-2.34864	0.102027	-0.882857
2011-09-09	12.6342	-2.441	0.738605	-3.65242	-5.90717	-0.496221
2011-09-13	-3.25242	0.0505712	2.02121	3.05288	-1.853	-1.98931
2011-09-14	-5.72436	0.374704	-2.11275	1.18103	2.25786	1.20294
2011-09-15	-7.44198	1.64603	-1.30065	-0.902743	1.03681	0.0448273
2011-09-16	-2.92263	-0.180453	-1.65024	-0.68981	-2.71882	-0.0601234
2011-09-19	6.00343	-1.83114	-0.708289	-1.66324	-5.86196	-2.28788
2011-09-20	1.63854	1.0439	0.557564	-3.7844	-0.505117	0.505352
2011-09-21	13.6554	-1.22961	0.686167	-3.48136	-3.04149	3.55278
2011-09-22	12.2476	-5.16945	-1.3889	-5.27351	-5.56568	-3.1109
2011-09-23	1.79688	-0.243404	-0.529631	2.14954	0.26032	-0.719365
2011-09-26	-4.28783	1.00455	-0.634212	0.431035	0.698164	-1.25019
2011-09-27	-2.67152	3.2401	2.16255	1.38001	5.84269	1.07549
2011-09-28	9.37182	-0.484273	-2.98499	-4.98431	-2.43605	-1.33467
2011-09-29	-3.78826	0.640695	0.357993	-0.999664	-0.314451	-2.26111
2011-09-30	10.8551	-0.813648	-2.3512	-3.97544	-4.15352	-0.524944
2011-10-10	-8.21013	2.37898	0.363081	4.20037	2.65219	-1.06906
2011-10-11	-0.272111	-0.364551	0.748312	-0.589359	-0.143256	-0.638288
2011-10-12	-4.20355	1.68598	-1.98226	2.84509	2.52793	3.43038
2011-10-13	-1.38004	-1.00531	-0.809145	0.13509	-2.12019	1.16438
2011-10-14	-7.74408	2.24131	0.626802	1.77292	2.83979	-0.300271
2011-10-17	16.7724	0.587885	-0.0622773	-3.97381	-2.71732	0.127649
2011-10-18	-3.57651	0.39567	1.68546	2.68907	-1.75988	-3.55143
2011-10-19	9.22025	1.4523	-3.30206	-3.19058	1.146	-0.766511
2011-10-20	2.53413	-0.712211	-0.207262	0.311581	-1.51678	-2.45814
2011-10-21	-9.4024	1.78139	0.355106	0.465558	2.24704	-1.83795
2011-10-24	-6.75401	0.440011	3.55739	4.11178	4.30486	1.74
2011-10-25	9.78138	0.613983	2.06694	-4.54278	3.08423	2.71798
2011-10-26	-6.11064	0.459346	-3.99531	1.96739	-0.243931	0.911974
2011-10-27	-15.7197	2.10648	1.37185	7.69234	7.07293	0.0177329
2011-10-28	-4.43521	-0.262091	-0.724914	1.41736	-1.67686	2.31971
2011-10-31	20.0553	-1.42737	2.19978	-4.76695	-12.3112	0.594073
2011-11-01	17.0324	-2.15628	1.71633	-4.76716	-7.06369	0.356669
2011-11-02	-3.87781	1.65334	-1.30928	1.40217	1.63993	1.41237
2011-11-03	-6.56844	0.667417	0.712013	1.44894	2.69268	0.457937
2011-11-04	-0.902376	-0.373072	0.454672	1.70496	-0.4232	0.942794
2011-11-07	-0.415699	0.989996	0.437032	-1.02934	1.73382	-0.926379
2011-11-08	-7.63451	0.430536	0.514386	1.14306	1.0289	-0.589861
2011-11-09	27.4387	-0.543241	0.894324	-5.16437	-5.37284	1.41967
2011-11-10	-6.7648	-0.261146	1.93492	-0.944781	-2.29169	-1.7513
2011-11-11	-8.51011	0.917947	-0.0549729	2.25265	6.56835	0.101924
2011-11-14	3.61854	-0.439688	-0.297606	-2.28718	-4.38712	2.65879
2011-11-15	1.28334	-0.525649	1.75263	0.103538	-5.51178	0.56555
2011-11-16	7.90625	0.57905	3.12	-0.953131	1.05867	-2.6545
2011-11-17	4.35626	-0.868845	-2.76899	-2.68236	-2.74085	-0.406855
2011-11-18	-6.35298	-1.4078	-0.602178	-1.07895	-0.279751	-3.07591
2011-11-21	3.10819	-2.83082	2.0862	-3.68298	-3.54563	0.367081
2011-11-22	-1.85988	-0.564049	1.48142	0.318382	-1.86395	-0.209879
2011-11-23	6.72935	-1.79577	0.00993281	-2.46085	-2.62413	-0.874033
2011-11-24	1.34973	-0.910312	0.841346	0	0.666523	-0.522868
2011-11-25	2.38733	0.251475	0.523535	-1.66187	-0.536085	-0.742732
2011-11-28	-5.97751	2.90515	-1.37251	4.38416	5.48285	0.187384
2011-11-29	-4.41086	0.152189	1.19997	-1.82559	-0.845168	1.83774
2011-11-30	-9.34368	3.78231	-3.2233	6.7561	5.05617	-4.27223
2011-12-01	-1.53207	-0.204466	-0.0869882	-0.177683	-0.735155	1.94058
2011-12-02	0.83304	0.520668	0.338362	-0.0533665	0.563525	-2.39335
2011-12-05	1.7677	1.19954	-0.918189	1.43099	1.78825	-2.94993
2011-12-06	1.73316	-0.760304	1.0208	-0.93401	-3.20576	-0.176167
2011-12-07	2.61086	0.382772	-0.981717	0.282886	-1.22984	0.266162
2011-12-08	7.28349	-1.1499	-0.781322	-4.34812	-4.47837	0.10374
2011-12-09	-13.569	-0.446869	0.68505	2.27883	1.65218	-0.855307
2011-12-12	-3.23325	-2.66926	0.431015	-2.16825	-3.53008	-1.07023
2011-12-13	-0.805342	0.424387	1.96833	-3.39079	0.349086	-3.18606
2011-12-14	2.82487	-2.48818	-3.04173	-3.92512	-3.16855	-1.3395
2011-12-15	-2.95948	0.306489	-1.59081	0.1782	0.42026	-2.72856
2011-12-16	-3.11943	-0.436802	-0.18008	-0.118765	0.552171	2.57997
2011-12-19	2.70138	-0.683079	1.09575	-2.44599	-2.81934	0.257599
2011-12-20	-6.46126	2.28614	1.1509	5.06538	3.86909	-0.207452
2011-12-21	-8.19166	-0.574673	1.496	-0.425368	-2.08816	-2.62019
2011-12-22	-1.68061	1.32784	-0.384546	2.27957	1.06066	-0.41704
2011-12-23	-2.00715	0.549932	-0.45178	0.0378716	1.0319	0.950654
2011-12-26	-0.00781508	0.0359232	-0.0481253	0	0	-0.79573
2011-12-27	5.67478	0.598119	1.44052	-0.455409	-0.163155	-2.13702
2011-12-28	7.72615	-0.982926	-0.710273	-2.44502	-2.1922	-0.0481785
2011-12-29	-2.88053	0.519526	-0.334	1.12404	-0.443059	0.51644
2011-12-30	3.31442	0.694607	-1.25323	0.211763	2.3111	1.70961
2012-01-04	-3.14122	-0.512243	0.49858	2.46926	-1.02355	-2.21079
2012-01-05	-3.37718	-1.34494	-0.426889	0.393222	-2.88919	-2.55609
2012-01-06	-4.09418	-0.487556	-0.0743709	-0.243241	-0.699207	0.87492
2012-01-09	1.94265	0.605723	-0.674302	1.54292	1.86492	4.35173
2012-01-10	-1.5148	1.31729	-0.320176	1.55581	4.01118	3.82314
2012-01-11	1.75046	-1.21365	-0.224494	5.73501	1.73365	0.135118
2012-01-12	-2.5043	-0.792206	-1.24752	2.15463	1.75759	0.262443
2012-01-13	2.06415	-0.216244	-0.11921	-2.70494	-4.50334	-2.62517
2012-01-16	0.30301	0.500667	-0.429927	0	2.09626	-3.41315
2012-01-17	6.16046	1.72467	0.864338	0.344294	0.431544	6.12673
2012-01-18	-5.39214	0.532818	-0.897553	3.47891	1.2297	-1.36833
2012-01-19	-5.2506	0.257804	-0.733088	-2.07957	3.50238	1.41326
2012-01-20	-8.6473	-1.14808	-1.45867	0.591368	-2.17982	0.569782
2012-01-30	4.55337	-0.444636	-0.164853	0.922284	-0.995579	-0.897193
2012-01-31	0.582527	0.451979	-0.676518	-2.10854	0.355496	-0.214522
2012-02-01	-4.59767	0.875671	-1.91551	2.27532	2.69799	-1.34112
2012-02-02	-3.4799	-0.294441	-1.24872	1.4722	1.25181	2.04835
2012-02-03	-5.3405	0.264511	0.979342	2.96066	4.68584	1.00187
2012-02-06	3.25552	0.564412	-1.27348	0.381862	-2.27582	0.422812
2012-02-07	-0.468059	0.700453	0.890957	-0.653233	-0.389255	-1.90813
2012-02-08	2.71998	0.200228	0.268729	2.2757	-1.899	3.40406
2012-02-09	2.70152	0.444116	0.892021	2.33197	1.06644	0.0232236
2012-02-10	11.152	-0.842075	0.156028	-3.82747	-1.68486	0.15686
2012-02-13	-7.83256	0.463747	1.38837	-0.0634618	-1.70128	0.842436
2012-02-14	2.0341	-0.268508	0.159843	-2.47442	-3.44466	-0.342803
2012-02-15	8.07276	0.398353	1.14233	-0.849539	-0.568779	1.36564
2012-02-16	-8.76246	-0.29188	0.240154	2.03011	-1.86533	-0.127373
2012-02-17	-8.40025	-0.0590178	0.465644	1.73723	2.75441	-0.419317
2012-02-20	-0.699058	0.451304	-0.443956	0	4.00056	0.155278
2012-02-21	2.14493	0.209234	2.41143	0.315507	-0.818108	1.2087
2012-02-22	0.106605	-0.0474066	0.444777	-1.29995	-1.63127	1.63055
2012-02-23	-7.99204	-0.32417	1.25944	-1.8033	-6.52998	0.171254
2012-02-24	2.23908	1.90709	0.253852	-1.72065	1.11911	1.06849
2012-02-27	5.00027	0.172855	-0.992124	-0.231673	-0.658015	0.488169
2012-02-28	-0.956699	-0.116699	-1.8393	0.215143	1.44284	-0.228746
2012-02-29	2.44417	-0.0342247	0.6371	-3.20847	-1.88894	-1.05626
2012-03-01	-6.41125	0.107897	1.16897	-0.685169	-1.80302	0.286758
2012-03-02	-0.422773	-0.536726	-1.56525	-1.55901	-1.37664	1.90038
2012-03-05	4.14656	0.122621	0.130119	-2.11723	-2.73504	-0.381042
2012-03-06	14.7587	-1.33612	0.0515151	-2.36366	-6.54292	-1.276
2012-03-07	-7.78936	-0.537023	1.39069	0.200638	-0.388205	-0.739881
2012-03-08	-6.60524	0.521153	-0.441785	1.59078	1.96795	1.57706
2012-03-09	-5.34644	-0.803736	1.13905	2.39225	1.75426	1.46374
2012-03-12	-9.51423	-1.34217	-0.391378	-0.791074	-1.74255	0.336344
2012-03-13	-6.48732	1.09238	-0.973456	3.11032	1.91334	0.807508
2012-03-14	2.56265	-0.341471	-0.785852	-0.859112	0.847982	-3.92467
2012-03-15	0.602876	-0.190455	-0.123204	2.33659	2.29037	-1.46094
2012-03-16	-6.60501	-0.275109	1.68573	0.605044	2.58833	2.35073
2012-03-19	2.99697	0.432576	0.737791	-0.503949	0.79175	1.13918
2012-03-20	3.42042	-1.08498	-1.21306	-0.101095	-2.54242	-1.85786
2012-03-21	-2.95567	-0.731997	2.00523	-1.54594	-0.864696	0.774794
2012-03-22	2.33215	-1.32815	-0.550402	-1.41382	-1.26772	-1.02925
2012-03-23	-5.04232	0.218462	0.943971	0.812802	2.47873	-1.84392
2012-03-26	-4.56935	1.24323	-1.19277	0.823332	1.25395	-0.310457
2012-03-27	8.17843	-0.414905	1.08022	-0.582493	-1.16756	0.303417
2012-03-28	-0.448005	-1.71891	-0.370234	-2.1185	-2.64086	-4.1298
2012-03-29	-0.253894	-0.666302	-1.9853	-0.140499	-3.16905	-1.56019
2012-03-30	-0.174239	0.867156	-0.53846	-0.052738	-0.16487	0.238684
2012-04-05	1.70769	0.0749419	1.81207	-5.79138	-10.5586	2.69527
2012-04-06	-0.0495078	-0.313017	0.249337	0	0	0.145594
2012-04-09	11.7197	0.63171	-0.725647	-2.43293	0.0611083	-1.50396
2012-04-10	8.92233	-1.34659	0.227327	-1.61666	-2.36773	0.945738
2012-04-11	-1.06239	0.429468	1.2037	2.92536	1.51253	-0.191783
2012-04-12	-15.1714	-0.457763	0.433091	1.45906	0.721823	1.76685
2012-04-13	11.5633	0.00474307	-0.154218	-1.72321	-3.84328	0.922304
2012-04-16	0.901301	0.234274	-0.0701431	-1.10183	3.67631	0.0288182
2012-04-17	-5.61673	0.841359	0.170221	2.39702	0.736277	-1.22642
2012-04-18	0.529718	-0.409176	-1.11464	-1.93961	-2.60861	2.24623
2012-04-19	-1.48979	-0.996971	0.36551	-0.381025	-1.01539	-0.274841
2012-04-20	-5.28697	-0.201847	0.618614	-0.727973	2.30673	0.490391
2012-04-23	7.91023	-0.680925	1.07198	-2.39334	-3.94067	-1.66708
2012-04-24	-4.10474	0.350462	-0.123315	0.0787402	1.17421	-0.701253
2012-04-25	-7.69279	-0.576632	0.59428	1.30976	0.885021	1.25171
2012-04-26	-4.23695	0.524084	-0.293624	1.10093	-1.61148	-0.199299
2012-04-27	-0.0341764	0.62874	-0.196156	0.612794	2.31126	-0.376064
2012-05-02	1.26607	-0.600451	-0.319	-0.0763942	-1.32019	2.47785
2012-05-03	3.88311	-0.292388	-2.12693	-2.28029	-2.37174	-0.0282415
2012-05-04	8.90289	-1.97878	-1.84499	-2.35352	-3.72352	0.944758
2012-05-07	-0.477731	-0.142851	-0.480987	-0.340784	-1.16276	0.769916
2012-05-08	0.552225	-1.33513	0.207331	-1.61947	1.0426	0.392042
2012-05-09	5.32271	-0.765541	0.734357	-1.04627	-2.18779	-2.07107
2012-05-10	-5.94436	0.326331	-0.353509	-0.475453	1.30155	0.626158
2012-05-11	5.04074	0.0744424	-0.780257	-0.124404	-1.16003	-0.859257
2012-05-14	9.93835	-1.81222	0.685713	-2.18129	-4.20741	-0.449189
2012-05-15	1.40127	-0.860894	-0.0458536	-1.43088	-3.958	-0.268336
2012-05-16	1.6825	-0.482944	-0.759867	-2.24044	-1.9461	-1.29292
2012-05-17	9.86897	-0.603692	0.788009	-3.37802	-3.14155	1.40454
2012-05-18	3.56455	-0.372731	-0.669468	-3.23728	0.0498534	-1.36692
2012-05-21	-12.459	-0.278808	0.70546	2.34594	-0.836546	0.520583
2012-05-22	1.42636	0.722796	-1.54541	-0.806735	2.82686	1.00654
2012-05-23	-0.3081	-2.27092	-0.0218063	0.668899	-5.8543	-0.806209
2012-05-24	-3.37733	0.847724	-0.0935833	-0.39157	0.0739791	-0.170213
2012-06-01	10.6926	-0.417187	-2.94445	-3.11756	-7.36663	1.90763
2012-06-04	-0.758444	0.334806	0.549876	-1.22172	-0.692302	-3.15041
2012-06-05	-5.25159	-0.415289	0.41266	2.66365	2.39455	-0.161421
2012-06-06	-10.7627	1.72417	-1.24211	2.20503	2.02971	0.073232
2012-06-07	-2.55796	0.716037	-1.01163	-1.03843	1.7334	-0.662227
2012-06-08	-2.26226	-1.04155	-0.101817	0.1854	-1.95348	-0.558203
2012-06-11	10.4216	0.831718	-1.82314	-2.31888	-3.36604	1.74603
2012-06-12	-5.354	-0.135193	0.544678	3.14895	-2.12085	-0.810957
2012-06-13	9.25084	1.20228	-1.37246	-1.48048	0.353916	1.53135
2012-06-14	-10.2392	-0.796381	1.64001	-0.0233073	-0.148438	-0.463123
2012-06-15	-3.21019	1.70596	-1.52049	3.07575	2.24867	-0.0163263
2012-06-18	-14.2449	-1.52723	-0.415514	1.32482	-0.468521	0.579487
2012-06-19	-0.75684	1.80491	-0.701676	1.7907	3.3269	-1.06505
2012-06-20	-6.49398	-0.291374	-2.8219	1.73766	1.50789	-0.225912
2012-06-21	14.645	-1.66287	-2.26396	-3.10543	0.171756	-1.30133
2012-06-25	11.0809	-1.19107	0.938727	0.597942	-5.55194	-2.6903
2012-06-26	-2.36574	0.48853	-0.380624	-0.531327	-2.47947	-0.338385
2012-06-27	-1.48523	1.06371	0.0509576	0.72985	-0.0793379	-0.606586
2012-06-28	1.26579	-0.119542	-3.03498	-1.44271	0.928947	-1.86179
2012-06-29	-14.1631	2.40599	6.06362	3.16858	6.68086	1.09343
2012-07-02	-2.8325	0.243876	-1.82034	1.2484	-2.26764	-0.0449219
2012-07-03	-1.21029	1.8453	2.89248	1.52837	1.30172	-0.45794
2012-07-04	-0.266767	-0.491884	0.390782	0	-1.50429	0.0907425
2012-07-05	4.72138	-0.345917	0.0431196	-1.10147	-0.58928	-1.85546
2012-07-06	-2.07302	-1.67741	-1.91975	-2.19647	-5.18178	1.9365
2012-07-09	4.72603	-0.33074	2.34068	-2.06783	-1.55997	-2.19312
2012-07-10	4.31209	0.0237576	-2.24298	-2.31601	0.432678	0.0576877
2012-07-11	-3.89316	0.324762	1.72394	0.567088	-3.14639	0.725619
2012-07-12	1.73985	-0.796325	1.07954	-0.908891	-3.02319	1.06773
2012-07-13	-8.98574	0.925931	-0.140522	0.908891	-0.427541	-0.932003
2012-07-16	1.35674	0.270931	1.34225	-0.589838	-1.45358	-3.35709
2012-07-17	-3.79156	-0.0811459	0.728738	-0.776614	-0.154086	0.566345
2012-07-18	-2.4325	0.637936	0.0239495	0.366217	1.06168	0.983058
2012-07-19	-4.89355	0.0387018	2.73157	0.614966	1.14522	0.836366
2012-07-20	4.52531	-0.55637	-0.609285	-1.94893	-1.10633	-0.625901
2012-07-23	13.6104	-1.13326	-1.95217	-2.72253	-0.122687	-1.18324
2012-07-24	10.4529	-0.0934122	1.05981	-1.8975	-1.17764	0.377326
2012-07-25	-4.79178	-0.540602	0.70744	-0.291404	-0.998699	-0.7283
2012-07-26	-10.1388	1.36303	-1.28804	1.04029	4.63406	-0.628697
2012-07-27	-5.69748	1.42375	-0.736592	1.81259	1.82955	-0.44451
2012-07-30	7.0708	1.23323	-1.06724	-1.38032	1.53713	-1.70173
2012-07-31	5.32575	-0.682704	-1.06465	-0.384154	1.17105	-1.93786
2012-08-01	0.555887	0.425147	0.609825	-2.31182	-2.17605	1.85296
2012-08-02	-7.56348	-1.92216	-0.813642	1.51481	-2.10492	-0.794513
2012-08-03	-12.2911	1.5785	2.71906	0.845109	3.80241	1.35401
2012-08-06	0.792408	0.831413	0.184925	2.4933	3.38959	2.53948
2012-08-07	0.0671941	1.33962	0.417741	1.69752	0.414046	0.632461
2012-08-08	-4.51321	-0.341529	-0.319791	0	-1.23911	-0.122286
2012-08-09	-0.891925	0.015542	-0.069699	1.00941	-0.942276	1.01547
2012-08-10	-3.96697	-0.393686	-0.428234	0.614406	-0.873247	-0.230038
2012-08-13	-7.96341	-0.936389	0.18833	-0.523145	0.127998	-1.94059
2012-08-14	7.01488	0.892135	0.36381	-0.778392	1.7258	0.389184
2012-08-15	-1.32372	-0.355587	1.17282	0.846784	0.737971	-1.21443
2012-08-16	-2.81515	0.420034	0.801079	1.67236	2.52629	-0.267652
2012-08-17	-6.66522	-0.782368	0.70793	0.357942	5.75684	0.177084
2012-08-20	3.17343	-0.0754765	0.185101	0.133899	0.677007	-0.28026
2012-08-21	6.69369	0.988794	0.247717	0.333964	4.28273	0.953796
2012-08-22	0.759258	-0.501654	1.05509	-0.356268	-3.89897	-0.951645
2012-08-23	5.20863	0.312455	-1.01501	-0.379931	1.05696	0.913028
2012-08-24	-4.8695	-0.589053	0.090296	-0.448834	-1.79607	-1.75148
2012-08-27	6.75499	0.610662	-0.870771	-0.722351	1.17308	-3.20149
2012-08-28	1.14214	0.169508	0.798642	0.294085	5.4743	0.282301
2012-08-29	3.28893	-0.232796	-0.507381	-0.725462	-1.60608	-1.05585
2012-08-30	4.51189	-0.378453	-0.352787	-3.00254	0.0757164	-0.696323
2012-08-31	-1.78874	0.383313	1.48941	0.561142	2.01833	-0.513165
2012-09-03	-0.24022	0.268171	-0.260763	0	1.26225	1.21344
2012-09-04	2.75072	-0.568429	-0.593718	-0.32695	2.90327	-0.96991
2012-09-05	-1.20968	-0.742081	0.615583	-0.586512	-2.26214	0.412695
2012-09-06	-13.0306	1.17085	-1.57864	2.21068	3.00864	1.09507
2012-09-07	-9.37145	0.615302	-0.146	0.916387	1.61121	4.23109
2012-09-10	11.3316	1.04671	-0.153536	-0.228311	1.74584	0.70212
2012-09-11	1.41393	0.736671	0.0803292	1.60983	-0.749709	-0.411027
2012-09-12	-3.88456	-0.352271	-0.0977393	0.828765	-0.725047	0.733898
2012-09-13	-12.2784	0.145024	0.498168	1.17531	-3.5154	-1.26948
2012-09-14	1.89655	3.01979	-1.8052	2.00792	4.58815	0.609828
2012-09-17	0.310071	-0.558063	-1.95328	-0.715605	3.30856	-2.94922
2012-09-18	-3.19839	-1.44211	-0.34399	0.0217604	0.582851	-0.770425
2012-09-19	-2.78478	-0.780332	-3.03858	0.260756	0.943519	0.964517
2012-09-20	0.712421	-0.214518	0.0879587	-1.37662	-1.04661	-3.26111
2012-09-21	-1.01293	0.180731	0.874989	-0.220264	1.17515	-0.053512
2012-09-24	0.701751	-0.469816	-0.612485	-1.66763	-1.37132	0.368878
2012-09-25	8.29614	0.824666	-0.869121	-3.00432	0.798802	-0.597766
2012-09-26	8.88437	-1.01651	-0.176004	-0.649052	-5.09836	-1.77117
2012-09-27	-11.979	-0.376567	1.68896	1.70629	2.83159	2.45287
2012-09-28	4.60069	-0.201957	0.785319	-1.1497	-2.94386	2.20246
2012-10-08	4.73026	-0.0860588	-0.290255	-1.96176	-0.259566	-0.576127
2012-10-09	8.03603	0.356545	3.4976	-1.09083	-4.1751	2.21697
2012-10-10	-0.104752	-0.86891	-0.517725	-1.10286	-2.9959	0.547257
2012-10-11	-4.61055	0.149696	0.48949	0.9597	0.517553	-1.36775
2012-10-12	2.85484	-0.275625	0.152448	-1.1286	-0.624646	-0.28695
2012-10-15	-5.55604	-0.240835	-0.133722	0.265284	-1.71507	-0.971586
2012-10-16	-1.03961	1.41759	-1.03241	1.43474	2.3698	-0.0883145
2012-10-17	-1.37594	1.12454	-1.02796	1.39104	0.378806	0.574733
2012-10-18	-0.690312	-0.228084	0.118556	-1.20129	-4.63597	1.63079
2012-10-19	12.2907	-0.0385395	-1.54243	-3.10457	-8.48557	-0.419651
2012-10-22	-1.85618	-0.401153	-1.2534	-0.0733586	-1.53904	0.0886668
2012-10-23	12.1669	-1.1799	-0.666775	-0.83518	-1.55497	-0.65123
2012-10-24	-1.80019	0.0330168	-1.23708	0.0739736	0.885368	0.161488
2012-10-25	-1.32357	0.0355101	0.25069	0.467233	-1.42637	-0.938725
2012-10-26	-1.87872	0.0200348	0.127078	-0.442587	-0.448064	-2.60701
2012-10-29	-0.218828	-0.588615	-0.384778	0	-2.66668	-0.639436
2012-10-30	-0.0972205	0.44119	-0.237835	0	2.28534	0.089676
2012-10-31	4.25184	-0.454015	1.26422	0.0739007	1.30532	0.810871
2012-11-01	-10.5419	-0.175919	0.52136	1.58792	-1.20641	2.01154
2012-11-02	4.30427	-0.365782	-2.05403	-2.40384	1.53145	0.163569
2012-11-05	4.82675	0.200178	1.00969	0.865164	-3.10345	-0.204225
2012-11-06	-4.34619	0.428141	2.88086	2.07047	0.486971	-0.233393
2012-11-07	7.76941	-1.50359	-3.22046	-2.96046	-4.51409	0.409263
2012-11-08	-2.55304	-1.1517	1.59576	-2.74404	-0.0319503	-2.52328
2012-11-09	0.433073	-0.217196	1.33933	-0.0255265	-2.46156	-0.467572
2012-11-12	-10.9345	-1.21139	-0.174489	-0.614599	-1.04456	0.943185
2012-11-13	-1.15746	-0.774341	0.361015	-2.28641	-1.24428	-1.85776
2012-11-14	7.08695	-0.659157	2.04364	-2.82535	-2.09329	0.543768
2012-11-15	0.836822	0.204453	-1.15834	-0.923418	-0.790148	-2.09081
2012-11-16	-9.1978	-1.7564	2.39186	-0.191179	-1.7587	-0.546137
2012-11-19	-8.27064	1.61004	1.10096	2.13666	0.207208	0.552889
2012-11-20	-1.96878	-0.28258	-2.75963	-0.375336	0.862457	-0.163076
2012-11-21	1.04668	0.451109	0.37814	0.829214	0.936436	1.1575
2012-11-22	-0.224104	0.115869	-0.128997	0	3.4703	-1.0655
2012-11-23	-1.4338	0.784779	0.252854	1.63808	0.452135	0.744647
2012-11-26	1.92794	-0.454151	-0.13159	0.679031	5.02913	-0.648914
2012-11-27	2.53198	-0.667003	0.0585886	0.182031	-4.31293	-2.80691
2012-11-28	-2.66768	-0.051578	-0.917375	1.80231	-1.89908	-2.06393
2012-11-29	-3.42166	0.643851	1.04757	0.939689	3.65133	-0.746081
2012-11-30	4.66346	0.263673	0.968567	0.579712	-0.762834	1.43952
2012-12-03	4.83092	0.490141	0.0363965	-0.832812	1.97023	-1.76823
2012-12-04	3.01788	-0.165126	-0.369417	0.151937	0.0695491	1.16659
2012-12-05	-3.84888	0.146383	-1.06241	-0.35488	1.01167	3.46815
2012-12-06	0.248784	0.225389	-2.05709	0.456043	-0.768626	-0.417815
2012-12-07	-4.35466	-0.232781	-0.445387	0.554577	-0.332885	1.91316
2012-12-10	0.374053	0.441198	-0.806343	1.37313	0.228797	1.49237
2012-12-11	-3.24114	0.351309	-0.232765	2.30402	2.05012	-0.39274
2012-12-12	1.89749	0.865533	0.482236	1.03653	1.77811	-0.0776895
2012-12-13	3.65082	-0.154572	-0.697734	-0.649587	0.214154	-1.27862
2012-12-14	2.70295	0.384465	0.778333	1.24732	1.63134	3.94977
2012-12-17	-3.91047	-0.215237	0.488306	0.665244	0.144759	0.823897
2012-12-18	-5.31976	0.349716	0.216741	1.03652	3.59991	0.460441
2012-12-19	10.2162	1.23419	1.27912	0.584182	1.20122	0.52934
2012-12-20	2.40008	0.392092	0.471749	-0.0233019	5.13869	1.12495
2012-12-21	1.04067	-0.612273	-1.07656	-1.50273	-1.34087	-0.347714
2012-12-24	-0.00250296	-0.0672353	-0.0156032	-0.498044	0.192657	0.253626
2012-12-25	-0.0789285	-0.0245914	-0.000136505	0	0	2.12366
2012-12-26	8.70999	0.767415	2.4539	0.592629	0.212243	0.429753
2012-12-27	0.635704	0.0474939	-0.1428	-0.878344	-3.09034	-0.399935
2012-12-28	15.5318	0.474643	0.373128	-1.03057	-2.36892	0.963874
2012-12-31	-21.7661	-1.42364	1.09749	1.95617	-0.883744	1.36277
2013-01-04	-5.71517	-0.30096	0.102647	7.83513	8.65816	0.0524688
2013-01-07	-1.15674	-0.7511	0.67074	-2.32029	5.54875	0.130266
2013-01-08	-1.77778	-0.286568	0.0863351	-0.134228	-1.72562	0.435693
2013-01-09	0.784518	0.373993	-0.347659	1.75307	0.133622	-0.0923641
2013-01-10	-2.73745	0.451394	0.211543	-0.772887	4.92742	0.577568
2013-01-11	-1.65343	0.135057	-0.503501	0.442381	2.28623	-1.85908
2013-01-14	0.570768	0.32643	0.352869	-1.08733	-3.13951	3.28972
2013-01-15	-0.21784	-0.00967469	-0.938508	0.866383	-1.39517	1.36858
2013-01-16	-1.45809	-0.242095	1.13296	-0.955669	-0.909587	-0.244339
2013-01-17	0.512629	0.534524	0.87047	0.0446528	1.01673	-1.38991
2013-01-18	-8.97218	-0.721219	0.170778	-0.2906	-0.337761	1.98794
2013-01-21	-1.25717	-0.0563726	-0.0391936	0	0.762902	0.326638
2013-01-22	-0.933006	0.0490561	0.597555	1.9728	-0.447927	-1.82096
2013-01-23	-0.430635	0.0533867	-1.14195	0	0.914181	0.219795
2013-01-24	1.19769	0.758444	0.152203	-0.0878349	-0.0609873	-1.91629
2013-01-25	1.07821	0.685074	-0.617689	0.460275	1.4268	0.329707
2013-01-28	4.66937	0.187257	0.667653	-0.262755	-1.63036	2.40061
2013-01-29	-2.06844	0.653857	0.469782	0.175246	-0.980612	0.445921
2013-01-30	6.65858	-0.0193358	0.753333	-0.83517	-2.17264	0.0447595
2013-01-31	-0.189738	-0.93428	0.314705	1.25015	-4.74183	0.376393
2013-02-01	-10.5791	-0.351678	-0.0237213	1.10546	-0.198654	0.295603
2013-02-04	11.5332	-0.612615	-0.490888	-1.89321	-3.88457	0.156451
2013-02-05	-6.21283	-0.481106	0.53414	1.35285	0.864002	1.14679
2013-02-06	-3.20054	-0.943256	0.592662	1.71899	3.23882	-0.117396
2013-02-07	-0.0587448	-1.29348	0.270237	-0.213265	4.18571	0.0431761
2013-02-08	-4.10806	-0.154615	-0.230211	-0.25652	0.157271	1.78199
2013-02-18	-0.774326	-0.106597	0.0311551	3.55341	2.61132	0.298082
2013-02-19	-1.86773	0.570522	0.218875	2.26702	1.24894	-2.09339
2013-02-20	16.8531	0.924338	-2.16409	-2.90945	1.90665	1.19281
2013-02-21	4.48534	-0.925524	-0.69886	-3.16816	-4.46198	-3.24908
2013-02-22	-7.12907	-0.0873245	-0.0314538	1.44868	1.09824	-0.453305
2013-02-25	28.3431	2.0843	-0.23272	-3.18033	1.41195	0.602526
2013-02-26	-9.74913	-1.89832	0.548254	-0.306145	-1.58842	-1.76252
2013-02-27	-14.4392	-0.30899	-0.424373	-0.241202	1.29222	0.3074
2013-02-28	3.74517	0.324029	-0.852642	-0.175786	-0.0770189	2.37744
2013-03-01	-0.979388	-0.542644	-1.10525	-0.418733	-1.52305	0.322616
2013-03-04	-9.56734	-1.09872	-0.231145	-0.331822	-0.785387	-3.17908
2013-03-05	-4.98697	0.631431	-0.0664949	2.25664	1.12305	1.83979
2013-03-06	-0.480729	0.450661	-0.861452	1.65435	0.178706	1.71704
2013-03-07	-4.05098	-0.117153	1.09751	0.488895	1.27599	-0.918857
2013-03-08	-4.49347	-0.517413	0.599695	0.676249	0.996219	-0.355686
2013-03-11	-9.44917	-0.534933	0.0301341	-0.337553	2.64539	-0.447024
2013-03-12	4.55968	0.43246	0.388476	0.463842	1.82469	-1.64087
2013-03-13	-3.93996	-0.784979	0.414105	-1.20624	-0.840188	-1.18965
2013-03-14	-5.54742	0.320949	-0.0553176	0.340064	1.57571	0.00440163
2013-03-15	-1.14813	-0.239549	0.574784	-0.702654	1.5178	-0.0512781
2013-03-18	15.9204	0.384751	0.859158	-1.2687	-1.82841	-2.24027
2013-03-19	8.09461	0.134485	-1.37632	-0.542477	-0.957007	0.580595
2013-03-20	-12.5274	-0.753891	0.789635	1.01743	0.452883	2.61076
2013-03-21	8.41722	0.443159	-0.473621	-1.36617	-0.341081	0.560879
2013-03-22	-2.86316	0.177662	1.02296	-0.899227	0.107384	0.0426025
2013-03-25	0.559275	-0.732693	1.81121	-0.929622	-2.79924	0.0578797
2013-03-26	-7.73816	-0.414446	1.5043	0	-0.114854	-1.32919
2013-03-27	1.80123	-0.176074	0.484724	-0.133511	-1.45812	0.440744
2013-03-28	-3.8716	-0.652768	0.996736	-0.178293	-1.17974	-2.58273
2013-03-29	-0.855786	-0.0400209	-0.0306356	0	0	-0.329899
2013-04-01	6.06477	0.559707	-0.32082	-1.34743	0.047639	-0.244955
2013-04-02	-6.10222	-0.621064	0.29664	-0.612316	-0.525282	-0.609952
2013-04-03	9.59636	-0.121222	-2.23188	-1.85977	-0.98751	-0.498223
2013-04-08	-5.85297	-0.636695	0.910016	1.7915	-0.974105	-0.362171
2013-04-09	-3.63535	0.445951	0.290977	4.01571	2.32801	1.60324
2013-04-10	-4.63254	0.0896202	0.111256	0.827531	4.82254	0.313358
2013-04-11	-1.92655	-0.261227	-1.10207	0.670055	-0.21236	-0.400871
2013-04-12	-2.24836	-1.18614	-1.52704	-0.800264	-0.245426	-0.897037
2013-04-15	35.0957	0.59462	-1.41783	-4.96374	-1.59796	-1.8873
2013-04-16	-18.8322	-1.50466	0.226544	1.96594	-1.13776	0.984577
2013-04-17	14.9625	-0.47783	-1.08973	-2.4234	-4.24343	0.0197172
2013-04-18	7.07069	1.10791	0.633589	-0.229516	-0.469786	0.200732
2013-04-19	-15.5412	-0.680021	0.0107547	1.43723	1.64045	2.24039
2013-04-22	-5.42345	-0.267373	0.756	1.99581	1.30736	0.240341
2013-04-23	-7.32074	0.385417	-0.288239	2.67267	1.9485	-2.85446
2013-04-24	-0.0621688	1.35331	1.3086	2.18097	1.19082	1.80356
2013-04-25	-0.402777	0.339326	2.05734	1.74027	1.56819	-1.15663
2013-04-26	-0.573561	-0.294514	-0.481893	0.249118	0.0780928	-1.03184
2013-05-02	-6.33067	-0.486189	3.24427	2.45763	3.36869	-0.202262
2013-05-03	-6.53665	0.865716	0.580083	0.544741	1.11749	2.19099
2013-05-06	-2.52363	-0.093228	0.494745	1.02093	0.967666	1.98858
2013-05-07	0.572267	0.545779	-1.01667	-1.26267	-0.123274	0.927692
2013-05-08	-1.84931	0.362329	0.608081	0.0403307	6.67179	0.921983
2013-05-09	2.93302	-0.158597	0.0463183	1.58019	-0.557341	0.182256
2013-05-10	-4.5086	-1.35398	0.528809	3.31802	-0.665537	0.681786
2013-05-13	-1.2333	-0.408216	-0.645545	2.65217	4.72631	-0.172874
2013-05-14	1.05805	0.770913	-1.63344	0.0747524	1.90005	-1.08831
2013-05-15	-0.173903	-1.01098	0.93751	1.24387	-0.669082	0.955149
2013-05-16	1.43698	-0.16843	1.11668	-0.16619	0.35338	1.14404
2013-05-17	-5.28506	0.108336	0.492101	2.69843	-1.70699	1.28788
2013-05-20	3.4884	0.753221	0.248524	4.17498	0.775994	1.60461
2013-05-21	2.37223	0.623177	-0.988974	0.0862292	1.97827	0.722203
2013-05-22	2.98664	-0.141171	-1.70174	-4.04557	1.42412	-0.132979
2013-05-23	1.56217	-0.979285	0.880748	0.679788	-1.45306	-1.49604
2013-05-24	-0.879171	-0.312098	0.0956591	0.799081	1.8055	1.20906
2013-05-27	-0.4961	-0.0585974	0.00558452	0	2.39647	0.451052
2013-05-28	2.97452	0.959587	0.235529	1.87478	3.87409	0.424362
2013-05-29	2.22459	-0.532324	-1.43273	-1.48643	1.40363	1.08192
2013-05-30	-2.22772	-0.189074	0.534242	1.29531	1.56581	-0.445014
2013-05-31	10.9551	-0.595407	-0.655684	-2.55408	-0.829651	-1.06054
2013-06-03	0.470003	0.306125	1.34304	-0.482877	-3.34696	-0.356435
2013-06-04	-0.238608	-0.159179	-0.0434174	-1.08148	0.126605	-1.39087
2013-06-05	7.05783	-0.738831	1.47529	-1.79197	-1.0702	0.667538
2013-06-06	-4.68887	-0.646956	1.35719	1.41067	-1.91781	-1.26992
2013-06-07	-9.91104	0.0356289	0.725659	0.39942	0.234377	-1.82796
2013-06-13	-11.8251	-0.559908	0.639469	-0.891807	-0.444916	-3.49831
2013-06-14	3.34434	0.0978452	1.28005	-0.32961	1.5126	1.33039
2013-06-17	-1.95293	0.714495	-0.822504	0.876558	2.7398	0.00181143
2013-06-18	-1.44642	-0.0714042	0.646006	1.40822	-0.0901834	0.188468
2013-06-19	-0.10798	-0.817406	0.476039	-1.11773	-1.63227	-0.254736
2013-06-20	20.625	-1.44369	-0.54819	-3.84378	-4.48054	-3.87356
2013-06-21	-6.44414	-1.21919	-1.14096	0.282194	-0.637887	-0.506245
2013-06-24	5.73847	-1.07443	2.80739	-2.51107	-3.00111	-6.09375
2013-06-25	-7.99138	0.0777865	-0.386784	2.26655	0.497929	-5.19046
2013-06-26	-7.67954	-0.0215172	-0.24222	2.23473	3.80668	1.50561
2013-06-27	-2.74823	0.0951889	1.35661	2.3659	4.65713	-1.7986
2013-06-28	-0.362115	0.311453	-0.810991	0.627523	-1.07855	0.00546724
2013-07-01	-3.13666	0.189797	1.11352	1.41972	-0.861676	1.53474
2013-07-02	-0.00669277	-0.345695	1.9095	-0.671855	-0.687466	1.13136
2013-07-03	-1.6685	-0.58739	2.02707	-0.0709849	-1.39103	-0.573893
2013-07-04	-0.340988	0.564414	-0.520971	0	2.62645	1.8279
2013-07-05	-8.67587	-1.56205	2.7735	2.64533	-1.09893	-0.275198
2013-07-08	-1.71828	0.779106	-0.860545	0.414079	3.82614	-4.16655
2013-07-09	-3.43032	0.225087	-0.0260124	-0.483259	0.665797	0.271362
2013-07-10	-1.62652	0.0508695	2.69499	0.895631	0.456204	3.48288
2013-07-11	-1.94566	1.97379	-3.34529	1.68328	4.79471	3.16186
2013-07-12	-1.793	0.240743	0.661788	-0.118094	1.26534	-1.53776
2013-07-15	-0.940626	0.310334	0.0121731	3.00962	0.882284	1.68666
2013-07-16	3.94574	0.586202	-0.599676	-0.525539	0.283202	1.18946
2013-07-17	-4.63845	0.358542	-0.134331	0.197401	-0.237223	-2.14707
2013-07-18	-0.866068	0.512467	0.948522	0.0164325	0.460158	-0.562533
2013-07-19	-9.87503	-0.494698	-0.138726	-0.27972	2.71735	-2.77527
2013-07-22	-3.32778	0.0609922	-1.31733	1.50453	2.41824	1.27302
2013-07-23	2.10256	0.553122	-0.0747679	0.485752	1.15818	2.65302
2013-07-24	3.60263	0.0244481	-1.56574	-2.40306	6.25386	-0.448735
2013-07-25	-1.8605	-0.257356	0.19435	1.08607	0.253956	-1.10201
2013-07-26	-2.62425	-0.47144	-0.511272	-0.492208	-0.236467	-0.549908
2013-07-29	4.37114	-0.325161	0.365393	-0.46159	-0.15616	-1.63964
2013-07-30	-0.175091	-0.56574	-0.956601	0.543793	1.12933	0.28505
2013-07-31	-0.0610642	-0.034896	1.88379	0.491804	1.57017	0.241198
2013-08-01	-4.3589	-0.167084	2.56784	-1.01908	2.04309	2.46226
2013-08-02	-8.57278	-1.11083	-0.429674	0.0165194	1.80678	0.0649984
2013-08-05	-2.46044	-0.542948	-0.0448725	1.84933	2.20148	1.45962
2013-08-06	6.31499	0.144456	-0.974726	-1.51951	-3.50587	1.60745
2013-08-07	1.91621	-0.213589	-0.612488	-3.60384	-1.33588	-0.807384
2013-08-08	-2.34493	0.190407	-1.24623	1.74271	3.2529	-0.202024
2013-08-09	4.46342	0.619742	2.1572	-0.0838997	-0.173221	0.810966
2013-08-12	-4.74362	-0.951498	0.665553	0.919047	-0.0464944	2.48605
2013-08-13	-4.88857	-0.198168	0.554349	-0.919047	-0.707617	0.402789
2013-08-14	4.78539	0.694554	-0.325328	-2.20647	1.24538	-0.565616
2013-08-15	12.0033	0.429878	0.738129	-2.85485	1.56538	-1.30616
2013-08-16	-1.95182	-0.0638961	0.0491928	0.475646	0.982213	-1.5389
2013-08-19	4.41943	-0.438215	0.273047	-2.63548	-4.84405	1.60304
2013-08-20	-1.26332	-0.505091	-1.67237	2.38913	-0.87495	-0.719778
2013-08-21	6.24818	-0.0201046	-0.710797	0.579712	1.68015	0.429162
2013-08-22	-7.47557	0.240056	0.485713	2.26869	2.04354	-0.113431
2013-08-23	-6.33089	0.478024	0.530626	1.24225	1.39757	-0.489028
2013-08-26	6.07901	0.147589	-0.272174	0.118313	-2.16637	1.73769
2013-08-27	11.3347	0.724638	2.87455	-3.92748	-6.45043	0.553418
2013-08-28	-1.02188	1.45397	-0.328687	0.560618	1.6816	-0.331683
2013-08-29	1.65413	-0.850577	-0.380604	0.765754	1.63699	-0.780162
2013-08-30	1.13885	-0.610317	-0.4909	-1.11577	-2.9531	-0.300564
2013-09-02	-0.0644792	0.307073	-0.28429	0	1.87304	0.832679
2013-09-03	-2.53229	-0.345328	0.960612	1.58278	-0.321981	1.20272
2013-09-04	-4.86243	0.319429	-1.77942	2.16788	-0.565315	0.100433
2013-09-05	-1.29905	0.441213	0.588444	1.89016	1.60085	-0.635155
2013-09-06	0.153031	0.581121	1.46607	-0.681689	2.60989	0.804121
2013-09-09	-1.63698	0.519627	-1.47347	1.96587	0.721688	1.19085
2013-09-10	-7.68835	-0.533834	-1.9552	1.36477	3.8637	1.57727
2013-09-11	-5.94984	0.0139253	-0.20573	-1.00552	1.01866	0.527245
2013-09-12	2.45898	0.000972646	1.0831	-1.82586	1.33323	0.162173
2013-09-13	-1.13463	0.0636566	-0.495183	0.875966	-0.411251	0.12439
2013-09-16	1.04445	0.792546	-2.14736	0.656063	1.44138	-0.267747
2013-09-17	0.722461	-0.0984205	-0.995297	0.0653702	0.191245	-1.38165
2013-09-18	-7.0119	-0.355423	2.3763	1.74903	0.647973	0.0963942
2013-09-23	8.07418	0.365198	-0.912998	0.0481502	-0.510596	1.96029
2013-09-24	-1.42765	-0.455776	-0.150675	0.815026	2.54205	-0.462554
2013-09-25	-1.02537	-0.118267	-0.429736	1.90752	-0.0476482	-1.08382
2013-09-26	-0.148484	-0.133813	0.449554	1.00987	3.3454	-2.12084
2013-09-27	9.05689	0.68594	-0.251471	0.846615	2.68415	0.326335
2013-09-30	7.49156	-0.209939	0.0592027	0.976213	-0.452938	0.993657
2013-10-08	5.7685	0.234757	0.551863	0.227428	5.21681	1.59821
2013-10-09	-3.17171	-0.924087	-1.23479	-2.0348	-2.34992	0.62695
2013-10-10	-17.5127	-0.358351	0.673091	3.11931	3.33821	-0.483225
2013-10-11	-6.19827	-0.00391259	-1.32829	2.42723	1.02255	1.79627
2013-10-14	1.48552	0.573694	-0.0445185	0.262851	-0.814989	0.937898
2013-10-15	14.8212	1.67223	-1.79749	-0.790634	2.04833	0.088383
2013-10-16	-22.7131	-1.56949	1.11381	1.15456	0.141903	-2.37935
2013-10-17	-10.7549	-0.607433	-1.69708	0.738331	0.7505	0.0839366
2013-10-18	-4.59209	0.328864	-0.419056	1.47472	-0.217213	0.287397
2013-10-21	0.0458239	0.113472	-1.70153	0.170406	2.8971	2.20305
2013-10-22	0.766392	0.431822	-1.78618	0.847702	1.53815	-0.602036
2013-10-23	0.227196	-1.0072	-0.10443	-1.73128	-2.47887	-1.92972
2013-10-24	-2.12837	0.182774	-0.0359675	0.570941	-0.739448	0.00675623
2013-10-25	-1.50883	0.0912232	0.57895	-2.5807	-3.24335	-1.99565
2013-10-28	1.02793	0.374715	0.563782	-1.94668	-3.03423	-0.243909
2013-10-29	0.319784	0.76725	-1.14564	1.59554	2.83011	-2.00308
2013-10-30	1.30415	0.0775253	-1.47689	-2.19301	-0.303944	2.05143
2013-10-31	0.358065	-0.485549	0.0167014	-0.0599431	0.675844	-1.2535
2013-11-01	-3.90855	-1.34483	-0.93504	1.22171	-0.119817	0.40369
2013-11-04	-3.46455	0.463893	-0.599968	3.59233	-0.574112	0.71107
2013-11-05	1.79566	-0.328646	-0.963184	0.683374	-1.34746	0.888904
2013-11-06	-5.00373	0.328851	0.938729	-1.71727	8.6907	-1.09871
2013-11-07	8.39494	-0.471645	0.226337	-4.56269	-3.58729	-1.29084
2013-11-08	-7.36305	-1.3156	1.12255	2.94752	-0.131705	-1.64255
2013-11-11	-3.99905	-0.0579672	0.376943	2.03289	-1.57347	0.816755
2013-11-12	1.40338	-0.47724	-1.75973	-2.01822	-0.937618	0.689089
2013-11-13	-2.82358	-0.560608	1.2046	1.98947	-0.664004	-2.19769
2013-11-14	-2.00505	0.791267	-0.937517	-0.287977	1.23178	1.52792
2013-11-15	-2.22309	0.742395	-0.694614	-0.1443	-0.767709	1.48428
2013-11-18	6.40511	1.38754	-1.71515	-1.88038	0.372688	2.15548
2013-11-19	2.13173	-0.073434	0.499015	-2.7448	-3.34577	0.0162706
2013-11-20	-0.264501	-0.181581	0.113583	-0.804803	-2.17758	0.697405
2013-11-21	-6.19435	-0.814958	2.57012	1.91776	1.16106	-0.813193
2013-11-22	-4.24108	0.291638	-1.13692	-0.871269	2.035	-0.425446
2013-11-25	3.29812	-0.33847	-0.334189	-1.38248	0.541738	-0.0488208
2013-11-26	-0.164012	-1.07515	0.461005	-0.0918274	0.0555267	-0.071559
2013-11-27	0.746722	-0.2757	-1.22194	1.11155	0.751116	1.31888
2013-11-28	-0.485775	-0.0165062	-0.0299988	0	2.35324	1.50273
2013-11-29	4.82254	0.527109	0.25592	0.588814	0.821446	0.177036
2013-12-02	3.68687	-0.480432	1.78302	-0.968091	-0.675764	-3.10331
2013-12-03	2.08697	-0.15681	2.57413	-0.778214	-4.82373	2.1006
2013-12-04	0.803839	-0.521173	1.67684	0.519482	-3.49196	1.67922
2013-12-05	2.25126	-0.0385332	0.328103	-1.10329	-0.661524	-0.0680062
2013-12-06	-9.1004	0.273098	-0.487162	-0.83553	2.27398	-0.425642
2013-12-09	-3.31881	0.168025	-0.666083	-1.85045	1.13545	0.283112
2013-12-10	2.33826	0.139397	1.18992	0.913824	-0.772533	-0.176723
2013-12-11	10.037	-0.0555942	-0.495848	-2.76691	1.57911	-1.5027
2013-12-12	1.22014	-0.34772	0.412223	-0.549718	-2.51515	0.245422
2013-12-13	1.21603	-0.334314	-0.588448	0.726923	1.11181	-0.0735376
2013-12-16	1.52905	1.11772	0.0158065	1.45405	1.29159	-2.07339
2013-12-17	0.994593	-0.467414	0.173725	0.837222	-2.28473	-0.530318
2013-12-18	-16.241	-0.229798	-0.13933	0.595987	4.03979	0.0473125
2013-12-19	0.863209	0.535797	0.558376	0.732262	2.33223	-0.954285
2013-12-20	-2.92903	-0.193798	0.54002	0.510956	1.35657	-2.41012
2013-12-23	-6.2594	0.229263	-0.980022	0.0926212	0.0339953	0.0999882
2013-12-24	-5.38178	-0.153846	0.125164	0.215783	-0.190523	0.365041
2013-12-25	-0.991796	-0.151069	0.0571166	0	0	1.01357
2013-12-26	-1.87938	0.23517	0.0073089	0.552742	0.186638	-1.87072
2013-12-27	0.296063	0.573662	0.277468	0.884152	1.19609	1.87424
2013-12-30	7.88193	0.35338	-0.90852	1.67059	0.382157	0.14071
2013-12-31	1.27347	0.593992	-1.33553	-0.239092	-0.181797	0.707846
2014-01-02	3.16293	-0.951774	-2.09553	2.56992	2.74225	0.129065
2014-01-03	-3.53393	-0.600951	-1.26239	0.943335	2.74886	-0.672099
2014-01-06	-2.25259	-0.62781	-0.169947	-0.173486	4.13502	-2.77834
2014-01-07	-5.40412	-0.0146415	-0.0520772	2.13307	4.91844	0.391158
2014-01-08	-1.33087	-0.64806	-0.975851	0.0566412	-2.10795	-0.063888
2014-01-09	-0.495061	-0.448201	-0.387912	-1.11033	0.570907	-1.63564
2014-01-10	-6.58146	0.0777809	0.695465	0.471261	1.76037	-1.28383
2014-01-13	7.85555	-0.247577	-0.358831	-3.06693	0.858869	-0.300118
2014-01-14	-7.76051	-0.703851	1.00771	3.43667	-0.193506	1.59773
2014-01-15	-1.18952	-0.0804165	1.67733	1.7727	1.4374	0.564985
2014-01-16	1.30727	-0.0920385	-0.0873587	1.04045	-0.834337	0.0737869
2014-01-17	-1.2168	-0.0493824	0.39248	-1.58579	-0.200889	-1.92157
2014-01-20	-0.69132	0.0157305	-0.0692738	0	-0.314391	-0.903223
2014-01-21	2.74537	0.310848	0.52557	0.768214	-1.0154	1.3698
2014-01-22	-0.585078	0.147221	1.63893	0.996824	0.325852	2.55891
2014-01-23	6.39361	-0.297403	1.20692	-2.5392	-0.177681	0.300191
2014-01-24	27.5764	0.454201	0.444981	-4.15464	-5.14692	1.1401
2014-01-27	-2.08427	-1.14701	-0.105244	-1.00667	-4.34903	-0.657763
2014-01-28	-10.0269	-0.769006	1.82931	2.41082	6.53517	0.00246751
2014-01-29	8.36861	0.0336063	0.374322	-1.56631	-1.47112	0.296754
2014-01-30	0.147504	0.00484139	0.87695	1.6389	2.11572	-0.919674
2014-02-07	-13.1231	-0.508493	1.74452	-2.42392	3.82425	1.37541
2014-02-10	-1.46051	-0.462734	0.478553	1.78326	1.04235	4.21652
2014-02-11	-5.45223	0.989518	-1.29411	-0.073062	1.95783	0.105077
2014-02-12	-2.236	0.0910161	0.208372	0.18985	-0.00790726	0.663886
2014-02-13	-1.68887	-0.347814	0.166969	2.36459	1.01334	-0.894262
2014-02-14	-4.65456	0.843411	-1.05348	-0.356863	1.47865	1.21708
2014-02-17	-0.816948	0.0633452	-0.11726	0	-0.508805	1.82971
2014-02-18	1.65088	0.364115	1.86471	3.02819	0.71222	-0.118644
2014-02-19	10.7879	0.983421	0.601302	-1.65062	-0.198016	0.0824069
2014-02-20	-4.18141	-0.0553755	-0.582976	1.84466	-0.724512	-1.17839
2014-02-21	-1.40382	0.0366605	-0.829419	-1.21197	0.386905	-0.592377
2014-02-24	-3.578	0.568172	-0.101703	1.84689	2.5941	-0.839639
2014-02-25	-4.684	-0.807695	-0.554184	0.370803	0.809575	-3.67403
2014-02-26	4.04618	-0.265893	1.18311	2.06221	0.0172017	1.43893
2014-02-27	-2.28232	-0.542405	0.13529	2.63714	-1.06156	0.0404297
2014-02-28	-0.879026	0.414179	-0.236819	-0.0130796	3.22906	1.49369
2014-03-03	12.8581	-0.92302	3.74624	-0.432589	-5.23226	1.88906
2014-03-04	-11.9362	0.350263	-2.51711	4.92155	4.37089	0.191602
2014-03-05	-2.79535	-0.980729	-1.16779	1.23052	2.2119	-0.568686
2014-03-06	1.63078	0.598724	-0.331023	1.069	2.65668	-0.647493
2014-03-07	-0.995779	-0.226753	1.12124	0.487687	-0.00843704	0.0607592
2014-03-10	0.143577	0.188724	-1.60439	-0.634458	-0.117489	-3.81466
2014-03-11	3.73898	-0.392313	-0.552926	-3.27205	0.323291	-0.333056
2014-03-12	-2.33101	-0.601808	-1.69151	0.743404	-2.74003	0.121682
2014-03-13	10.8633	0.376324	0.485789	-1.65816	-2.79053	0.999469
2014-03-14	9.98655	0.638226	0.697493	-0.61452	-2.8592	-0.725013
2014-03-17	-12.3977	-0.288227	-1.28993	0.371724	4.98187	1.98444
2014-03-18	-8.60858	0.109662	1.0423	1.86329	-0.446028	0.570896
2014-03-19	3.04075	-0.0979349	0.908363	-0.705737	0.495384	-0.456034
2014-03-20	-4.14528	-0.715204	-0.576744	-0.0506009	-0.291405	-2.8937
2014-03-21	2.57092	0.490477	-0.263266	-1.41449	-0.474163	2.1733
2014-03-24	0.456074	-0.0661094	0.206331	-2.33716	-3.44794	0.699283
2014-03-25	-7.64313	0.451815	-1.24801	0.680809	-0.289541	0.472682
2014-03-26	5.30024	0.945103	0.54264	-5.16779	2.71811	0.396694
2014-03-27	-2.04718	0.586028	0.376571	-0.634048	0.393693	-1.88947
2014-03-28	-1.96453	0.715578	-0.357966	0.97696	2.12795	-0.794065
2014-03-31	-4.28002	0.122654	-0.451835	1.10303	0.382473	-0.47338
2014-04-01	-6.54039	-0.330264	-1.92943	2.88328	4.25034	1.24077
2014-04-02	-1.08265	0.0266286	-0.221064	0.721078	1.86609	0.0669277
2014-04-03	1.50893	-0.292768	0.990021	-1.96563	0.164561	-0.458458
2014-04-04	3.93132	0.755492	0.39946	-2.85135	0.597959	1.19728
2014-04-08	-3.95305	-0.188793	2.01148	-2.14764	-4.39851	1.4672
2014-04-09	-8.08808	-0.289872	0.785615	2.09279	2.44978	0.585467
2014-04-10	12.9153	1.08495	-0.414801	-3.9303	-0.480648	1.00022
2014-04-11	7.62806	0.234771	0.539392	-2.03192	-2.69907	-0.504794
2014-04-14	-5.14099	0.00485542	-0.0121772	-0.350008	-4.86982	0.62124
2014-04-15	-3.75633	-0.453564	-0.12743	-0.600778	-3.2274	-1.26895
2014-04-16	-10.1557	-0.112069	-0.482909	2.68268	2.90708	-0.300563
2014-04-17	-7.11287	0.261014	-0.122631	0.357067	1.04466	0.0455585
2014-04-18	-1.01969	0.101713	-0.161646	0	0	0.337268
2014-04-21	-1.40005	-0.0982815	0.055858	1.55612	-0.225149	-1.44328
2014-04-22	-1.06702	-0.450075	-1.85979	2.53634	4.78086	-0.708589
2014-04-23	0.00933532	-0.192063	-0.529175	-1.2532	-1.28984	-0.120932
2014-04-24	-0.131636	0.0225715	0.448064	0.470069	-1.94438	-0.953197
2014-04-25	4.89414	0.082113	-1.13493	-2.71232	-1.42959	-1.844
2014-04-28	-0.708059	0.50641	-0.253525	-3.40188	-0.297685	-2.23129
2014-04-29	-2.36431	1.08432	-0.646257	0.0293212	0.968639	1.3955
2014-04-30	-2.84674	0.24336	-1.91847	0.686585	2.32101	0.195736
2014-05-05	2.11457	0.290228	-0.428151	-0.262391	3.27405	0.629962
2014-05-06	3.41438	0.850617	-0.535256	-2.76747	1.01073	0.314995
2014-05-07	-3.14279	0.665481	0.502686	-2.13855	-3.06902	-1.53995
2014-05-08	-0.500865	-0.299297	-0.295262	-3.33572	1.54142	0.0718071
2014-05-09	-4.39915	-1.0514	0.369099	1.15043	3.34106	-0.482373
2014-05-12	-6.35795	-0.125218	0.330926	2.50671	2.82567	2.83136
2014-05-13	-1.91371	-0.0432478	1.01	-0.398102	-2.32174	-0.694385
2014-05-14	-0.449797	0.0201541	0.597169	-2.45392	0.931465	-0.11167
2014-05-15	7.22978	-0.315323	-0.192169	-1.96894	-2.55145	-1.56944
2014-05-16	-5.69216	-0.256815	0.394236	0.336189	-1.4645	-0.0560753
2014-05-19	-1.1801	0.305903	0.230532	1.09673	0.602765	-0.658121
2014-05-20	3.56499	-0.409851	0.370308	-1.60947	1.40847	0.187565
2014-05-21	-8.73047	0.0341632	1.04074	3.25566	1.41823	0.908377
2014-05-22	-0.302486	-0.355117	-0.0463376	0.743613	1.11948	-0.293691
2014-05-23	-6.4035	-0.632108	0.751901	1.50125	-0.629741	0.783822
2014-05-26	-1.20317	0.10184	-0.172089	0	2.28322	1.11074
2014-05-27	0.489605	-0.739603	0.415966	1.14892	0.750063	-0.240701
2014-05-28	0.787061	-0.163469	-1.17615	1.2992	1.22906	0.880292
2014-05-29	-1.58228	0.137285	0.609846	1.17995	0.346865	-0.937299
2014-05-30	-2.30358	-0.872915	-0.240035	-1.68568	0.998969	0.199655
2014-06-03	1.8163	0.444949	-0.11157	-2.4454	-1.81701	-0.249088
2014-06-04	1.21649	-0.496068	0.458438	0.350851	2.68501	-1.02017
2014-06-05	-3.92301	0.201138	-0.566606	1.52629	0.522402	0.945699
2014-06-06	-9.46455	0.307861	-0.638932	0.254625	2.94282	-0.310422
2014-06-09	2.32933	0.398753	1.46206	0.730311	0.364229	0.00681785
2014-06-10	-2.03584	0.11071	-0.284092	-0.297442	-2.01256	0.959394
2014-06-11	4.47068	0.653181	-0.278321	0.0297841	-1.94497	0.60025
2014-06-12	7.57506	1.34856	1.27085	-0.253448	0.326696	-0.194841
2014-06-13	-3.10546	0.391508	-0.172046	1.18713	0.80349	1.56595
2014-06-16	2.92584	0.335567	-0.149697	1.76918	-2.75015	0.8809
2014-06-17	-5.13982	-0.987874	0.0360406	3.02621	-1.08579	-0.825302
2014-06-18	-13.8335	-0.381255	-0.835764	1.3408	2.76608	-0.168744
2014-06-19	-1.75246	0.470925	-0.0870004	-0.93387	0.892548	-2.32224
2014-06-20	1.18239	0.194631	0.659381	0.711647	1.06894	0.792202
2014-06-23	0.476943	0.548526	-1.48267	-0.0139053	-1.34538	0.680679
2014-06-24	9.21215	0.538668	-0.092726	-2.37822	-2.68536	0.956145
2014-06-25	-4.51782	-1.53459	1.48953	1.24542	-1.61956	-0.69418
2014-06-26	-0.691383	-0.245141	-0.466782	0.407047	0.833852	1.07747
2014-06-27	-3.98371	-0.496233	0.0906371	0.377491	-0.153015	1.06964
2014-06-30	1.67717	0.115629	-0.372231	0.612133	1.5254	1.01569
2014-07-01	-4.28217	-0.18251	-0.129673	0.663536	-0.372998	0.531637
2014-07-02	-4.07916	0.0343348	-1.09583	-1.03872	0.228389	0.478704
2014-07-03	-5.83484	-0.385498	-0.417045	0.153022	0.879566	1.1202
2014-07-04	-1.3009	-0.427433	0.277159	0	-2.01334	-0.403494
2014-07-07	8.3683	0.208176	-0.234968	-2.54818	-1.47899	-0.0886724
2014-07-08	5.45366	0.109939	0.0702493	-2.33709	-4.00485	1.06797
2014-07-09	-3.05057	-0.0482329	-1.2265	0.465998	0.50174	-1.12238
2014-07-10	6.83874	-0.235673	1.19458	-1.18379	-3.61358	0.255019
2014-07-11	-4.21892	-0.630399	-1.77413	0.220281	1.54402	1.17972
2014-07-14	-3.12971	0.132032	-0.227232	0.93445	1.01875	2.13191
2014-07-15	0.271785	-0.520931	-0.499819	-0.393157	-2.23386	-0.0667753
2014-07-16	-9.00664	0.159307	0.571873	-0.614666	3.8367	-0.860271
2014-07-17	26.4602	1.00021	2.56147	-2.30168	-0.726174	-0.905472
2014-07-18	-17.1381	-1.37196	0.13851	1.81607	-1.11592	0.170074
2014-07-21	4.1304	0.0574066	1.57226	0.983494	-0.321036	0.252952
2014-07-22	-4.8087	0.642229	-1.00214	1.03176	2.10632	2.03725
2014-07-23	-7.04046	-0.474155	-1.25876	-0.565424	-0.483133	-0.494835
2014-07-24	1.51037	0.302999	-1.21554	-1.02295	0.246214	0.217648
2014-07-25	6.36977	-0.316383	0.633385	-0.633613	1.11676	1.13923
2014-07-28	-1.13633	-0.453976	-0.103016	-0.162734	0.481884	1.53011
2014-07-29	4.90271	-0.0905734	-0.353739	-0.222338	-0.424915	0.827824
2014-07-30	0.227676	-0.642278	-0.147839	0.532782	-0.996987	-0.171357
2014-07-31	23.5399	0.489197	-1.22785	-2.8445	-3.09755	0.925843
2014-08-01	2.04241	-0.41433	0.158368	-1.66913	-1.70825	-1.31408
2014-08-04	-11.8924	-0.493006	0.154943	0.446808	1.09997	1.7626
2014-08-05	9.76167	-0.105134	-0.306811	0.245663	-1.00317	0.258659
2014-08-06	-2.4534	-0.357087	-0.321692	0.931091	-3.07929	0.684425
2014-08-07	1.37269	-0.508962	0.930209	0.515231	-0.315748	-1.24968
2014-08-08	-5.56766	-0.438808	0.364574	0.392217	-1.2356	0.34019
2014-08-11	-10.9414	-0.388524	0.140112	2.13012	5.36621	1.49441
2014-08-12	-1.91381	-0.871159	-0.102644	-1.63451	1.85968	0.295532
2014-08-13	-9.66473	-0.757263	0.315148	1.61977	-0.142199	-0.146051
2014-08-14	-5.04944	-0.498548	-1.95402	1.28883	0.74294	-0.459028
2014-08-15	4.73692	0.695672	1.48718	0.145412	-2.15326	0.862041
2014-08-18	-6.69433	-0.0762961	-1.2986	1.91414	2.55988	1.14766
2014-08-19	-2.00356	0.561424	-2.63422	0.837538	1.26413	0.107253
2014-08-20	-4.36126	-0.221645	1.59686	0.352784	-0.423626	-0.0598215
2014-08-21	-1.17076	0.0845563	-2.37621	-0.169181	-2.16535	-0.156834
2014-08-22	-3.26646	-1.13712	0.44574	0.464561	-0.710469	0.429916
2014-08-25	1.02604	0.907228	-1.05938	0.0702001	1.29608	-0.768149
2014-08-26	-1.21613	0.412359	0.105226	0.0981974	-1.21812	-1.2068
2014-08-27	0.492499	0.452342	-0.356428	-0.520139	0.640728	0.290588
2014-08-28	1.62091	-0.376275	1.10892	-0.820837	-1.91647	-0.899033
2014-08-29	-1.11227	0.0648911	1.34504	1.13043	0.337522	1.4048
2014-09-01	-0.738366	0.238078	-0.262965	0	-0.151884	1.42376
2014-09-02	1.51776	-0.502514	-2.76188	0.797709	-0.39122	1.15537
2014-09-03	0.380626	1.03397	1.93989	-0.503075	2.17754	1.26307
2014-09-04	1.65644	-0.782636	-0.398521	0.684121	0.540293	0.582229
2014-09-05	-4.90644	-0.267409	-1.29918	0.499654	-1.15723	1.34836
2014-09-09	6.11153	-0.180316	0.57942	-0.945897	-3.89619	0.678213
2014-09-10	-4.7371	-0.931183	-0.654813	1.2086	1.60213	-0.0728736
2014-09-11	-1.52182	-0.494637	1.57993	0.385888	-0.233671	-0.498931
2014-09-12	3.2348	-0.67633	0.141403	0.137457	-1.17161	1.38137
2014-09-15	5.64062	0.397208	0.661588	-3.45175	-3.09299	0.516982
2014-09-16	-10.3681	0.0234457	1.46646	-0.227758	-1.80405	-3.29232
2014-09-17	-1.95873	-0.0130604	-0.601925	1.11955	1.78708	0.499413
2014-09-18	-5.74674	-0.759807	-1.12778	-0.268116	0.975625	0.486145
2014-09-19	-0.409048	-0.402901	-0.405356	-1.48045	-0.600105	1.09038
2014-09-22	11.5922	-0.000265522	-0.331431	-2.58585	1.48886	-1.59474
2014-09-23	9.05681	0.0768096	0.471003	0	-1.18872	1.30582
2014-09-24	-11.4604	-0.89438	1.45134	0.689304	-0.421474	1.74176
2014-09-25	15.0846	-0.218525	0.729197	-2.05249	-2.01649	0.487999
2014-09-26	-4.34788	0.0698334	0.76391	0.950267	0.256449	0.37685
2014-09-29	6.67019	-0.456486	1.8462	-0.325637	-1.09486	1.18868
2014-09-30	2.29412	-0.0925092	-3.48053	-2.00666	-0.0658924	0.19493
2014-10-08	-12.3004	-1.34347	-1.30378	-6.33795	-16.4227	1.10372
2014-10-09	20.416	0.590768	-1.15406	-4.8033	-1.09887	0.647499
2014-10-10	13.9059	-1.03916	1.71756	-3.63301	-6.63938	-1.05591
2014-10-13	16.0418	1.8984	-0.837644	-3.64261	0.646181	0.241497
2014-10-14	-6.23957	-1.82551	-3.45511	1.76645	-0.284113	-0.382095
2014-10-15	13.9541	-0.37069	1.01429	2.5751	-3.5774	0.186944
2014-10-16	-2.5779	-0.623761	1.49261	2.71401	0.300405	-1.62527
2014-10-17	-13.3918	0.858695	-1.44846	-0.0847673	5.63376	-0.538571
2014-10-20	-17.6603	-2.58014	1.15699	1.31426	-0.166309	0.977017
2014-10-21	-15.7115	0.54021	-1.24508	2.25101	4.939	-0.879239
2014-10-22	9.1741	0.0903538	-2.38205	-3.26044	1.13651	-0.902386
2014-10-23	-7.19883	-0.328781	1.79126	1.75987	-0.179806	-1.26176
2014-10-24	-3.29055	-0.28912	-1.27811	0.0830358	-2.14794	-0.0992789
2014-10-27	-0.903371	-1.37093	1.09786	-1.70773	-1.47825	0.0505039
2014-10-28	-11.1546	0.539792	-0.591707	3.8428	3.19618	2.58793
2014-10-29	3.93873	0.771896	0.495248	-0.668463	-1.29221	1.27214
2014-10-30	-4.27483	-0.346431	-1.28252	-0.0163599	-0.557145	0.536212
2014-10-31	-4.1238	0.641007	-1.5174	3.12475	3.01426	0.169484
2014-11-03	4.13917	-1.26974	-0.902201	0.190114	1.99441	0.65021
2014-11-04	1.02675	-1.78702	-0.462505	-1.57936	-2.1741	0.207662
2014-11-05	-5.22223	0.0652709	1.54487	-1.42513	-1.90831	-0.365717
2014-11-06	-4.38806	-0.555315	-0.770315	-0.917588	-0.729637	0.816119
2014-11-07	-4.89335	0.0390527	0.619342	0.213763	7.46632	-0.994712
2014-11-10	-4.37348	0.00520766	-1.86971	0.213307	-1.86118	1.51067
2014-11-11	1.05796	-0.495959	1.16415	-1.08768	-0.319745	-2.46108
2014-11-12	0.301314	-0.205852	-0.802874	-0.731751	-1.2467	1.4281
2014-11-13	5.23177	-1.23409	-2.58596	-2.09149	-2.91445	-1.13113
2014-11-14	-3.61211	-0.219858	2.11495	0.391257	-4.2204	-0.00959915
2014-11-17	4.21405	0.147929	-0.144252	-1.50533	3.09977	0.967521
2014-11-18	-1.05654	0.454279	-1.83772	2.83767	4.64439	0.020226
2014-11-19	0.196262	0.372639	-0.366155	-1.3663	1.59187	-0.460344
2014-11-20	-3.18023	0.582619	0.6354	1.8343	-0.937313	-0.0207258
2014-11-21	-5.84495	1.32493	-0.261444	0.48241	0.781561	0.905276
2014-11-24	-3.17212	-0.688723	-0.56244	0.29826	-0.239633	1.40977
2014-11-25	-3.78941	-1.3902	-1.29118	-0.597413	1.65122	1.48158
2014-11-26	-2.38243	-0.769729	-0.0310023	0.133067	0.594507	0.096797
2014-11-27	-0.820554	-2.41388	2.01097	0	-2.58955	0.590287
2014-11-28	9.22328	-3.3941	-7.37532	-4.10575	-4.22974	-0.5012
2014-12-01	7.12815	0.481502	4.18912	-4.87988	-2.0561	-0.636882
2014-12-02	-10.5003	0.28199	-3.97118	2.01627	0.744424	1.33995
2014-12-03	-4.32618	0.366292	0.169618	1.32781	0.342622	2.13187
2014-12-04	-1.63997	-1.71592	0.515588	-0.918734	1.13873	1.82919
2014-12-05	-5.35827	-1.50538	-0.487714	1.25233	2.36832	-2.94145
2014-12-08	17.3463	-1.40316	-2.16414	-3.84147	-1.62428	3.67552
2014-12-09	5.53619	-0.328736	1.79131	1.8051	-1.96944	-2.93429
2014-12-10	21.9345	-0.480532	-2.98618	-3.47655	0.584499	4.20357
2014-12-11	9.61665	0.221563	-1.30342	-0.352538	-1.29335	0.605772
2014-12-12	5.65756	-2.13402	-1.49952	-1.95201	-1.77776	0.420927
2014-12-15	-2.60296	-3.21563	-0.742403	-1.60493	-1.24484	0.747598
2014-12-16	14.2726	1.90645	-0.815182	-0.308642	-1.80321	0.228924
2014-12-17	-17.8929	2.21642	-1.96812	3.43716	-0.718566	-1.11205
2014-12-18	-15.8008	0.769711	-5.83718	1.31666	3.7694	1.04631
2014-12-19	-3.24467	2.01926	2.42303	1.44493	0.291256	0.85674
2014-12-22	-8.24817	-0.184434	-2.57745	0.181422	1.72903	-1.64916
2014-12-23	-3.906	0.480574	2.66077	0.506239	-1.61646	-3.07147
2014-12-24	-3.58458	-0.601492	-1.9683	0.252162	-0.0479678	0.0186221
2014-12-25	-0.655396	-0.0763799	0.0118911	0	0	1.93609
2014-12-26	0.459799	-0.168178	-1.85427	0.627636	-0.153282	0.916986
2014-12-29	3.44334	0.0127719	-1.90149	-0.501793	-0.501189	-0.843411
2014-12-30	5.48097	-0.42693	1.60553	-0.884243	-1.89576	-2.30579
2014-12-31	18.8909	0.745706	-1.17656	0.271518	-1.01984	2.20866
2015-01-05	10.6768	-3.19631	-1.82948	-3.15854	1.73004	3.86064
2015-01-06	6.71319	-0.208517	-3.76765	-2.51265	3.18817	1.41274
2015-01-07	-8.30162	-0.46285	1.4043	0.114723	-2.93193	1.05857
2015-01-08	-13.2542	1.7297	-1.96216	2.04282	1.20015	-1.15219
2015-01-09	2.00631	-1.01273	0.0810867	-0.600941	0.116636	-1.27905
2015-01-12	11.092	-1.13573	-3.26735	-1.59487	1.68339	-1.22677
2015-01-13	5.65227	0.0162354	-0.103883	0.74364	0.600417	1.38196
2015-01-14	4.91886	-0.626664	6.28908	-0.954388	-1.55009	-0.702192
2015-01-15	4.70042	1.14098	-5.44139	-3.13652	-2.14335	1.44198
2015-01-16	-6.05214	1.66595	3.35212	0.965049	0.507259	1.40724
2015-01-19	-0.288834	-0.104795	0.0569522	0	3.77673	-5.97155
2015-01-20	-5.05876	-0.438897	-4.76363	-1.54062	-0.76431	2.80119
2015-01-21	-5.66186	1.60804	1.23497	0.654699	1.02914	3.18598
2015-01-22	-14.3368	-0.0846468	-3.87652	1.53064	0.171096	1.46314
2015-01-23	0.321651	-0.564167	-1.08092	0.427517	-2.60136	-0.60134
2015-01-26	-7.24265	-0.194248	-1.22767	2.01562	4.85102	1.84759
2015-01-27	9.58258	1.12814	1.91748	-0.019006	-1.86642	0.757644
2015-01-28	17.7142	-1.29443	-1.8333	-2.52155	0.405745	-1.20439
2015-01-29	-7.16012	-2.40855	1.82914	1.04713	-0.535111	-0.116032
2015-01-30	10.6063	0.530985	8.12689	-0.852388	0.522678	-1.97338
2015-02-02	-6.69447	2.38778	0.274252	2.70624	1.46086	-2.14223
2015-02-03	-11.8832	2.90802	3.6002	3.58941	4.16307	1.55909
2015-02-04	4.61855	-0.790217	-8.14798	-1.32404	-0.00503732	-0.169754
2015-02-05	-8.11988	0.704736	3.02481	1.47007	2.75006	-1.56615
2015-02-06	1.82125	-0.169329	2.59996	-0.530408	-0.989945	-2.04812
2015-02-09	7.04337	1.16277	1.61909	0.25641	0.60203	-0.500884
2015-02-10	-6.88784	-1.79917	-4.38132	0.638164	0.303749	1.66343
2015-02-11	-2.21332	-0.830062	-1.81562	1.1565	-6.12706	0.662235
2015-02-12	-10.3537	0.681004	3.55341	1.56866	3.16688	0.760505
2015-02-13	-5.38616	1.95401	1.02066	0.229662	-0.938219	1.4358
2015-02-16	-0.755408	-0.642694	0.492837	0	0.686974	1.56846
2015-02-17	6.86815	0.440362	1.40266	0.0881912	0.554764	0.835301
2015-02-25	0.152534	0.0222219	3.3838	2.90178	4.87986	0.167735
2015-02-26	0.0683399	-0.694505	-5.10556	-0.687406	-0.464797	1.47364
2015-02-27	-4.61911	-0.449764	3.35695	-0.952966	0.462398	0.432069
2015-03-02	-3.11372	-1.3227	0.602048	1.67462	-0.312305	1.70031
2015-03-03	5.33664	0.241273	1.93447	-1.63981	-2.25653	-1.13348
2015-03-04	2.58027	-0.719687	2.72636	0.0521966	0.160657	0.907065
2015-03-05	-1.56216	-0.263265	-1.38416	3.18411	2.27937	-0.0752077
2015-03-06	7.39755	-0.921536	-1.09999	-1.66501	-0.98068	-0.634216
2015-03-09	-0.694614	-0.569287	1.21625	-0.739407	-0.843531	1.12835
2015-03-10	9.90117	-2.29885	-0.963815	-2.11048	-2.12675	0.505673
2015-03-11	1.62261	-0.191437	-0.00975157	0.422164	0.816988	0.0736577
2015-03-12	-9.02819	-0.713532	-2.26482	1.03031	0.106504	0.436658
2015-03-13	2.74052	-1.61448	-3.28633	-0.540024	-0.906004	0.594451
2015-03-16	-2.50371	0.149835	-2.45078	-0.437637	1.39249	2.17715
2015-03-17	-0.136244	0.592445	-1.49529	1.35914	-1.45663	1.58423
2015-03-18	-11.6977	1.09851	1.10419	1.18711	1.24948	1.92993
2015-03-19	-0.577499	-0.319078	-1.35501	-0.0342114	0.219465	1.10497
2015-03-20	-8.22154	1.51702	2.14225	1.10592	3.37527	0.345179
2015-03-23	1.81306	0.601776	3.28232	0.808902	1.99156	2.1667
2015-03-24	1.19353	-0.245078	0.387346	0.802412	-0.436723	0.401919
2015-03-25	12.1591	1.72886	2.69826	-3.12869	0.450729	0.0753244
2015-03-26	2.90713	-0.608656	5.08236	-0.18915	-2.92185	0.58081
2015-03-27	-4.77246	-1.24137	-4.32483	0.429369	1.55405	0.629813
2015-03-30	-4.46016	0.835364	-1.37533	0.700199	0.611786	1.81851
2015-03-31	4.53063	-0.597114	-1.49214	-0.460555	-1.05923	-0.564054
2015-04-01	-1.15498	0.788026	4.33991	0.426513	1.87357	2.59578
2015-04-02	-3.35971	0.265989	-2.34939	0.712471	1.31633	1.17909
2015-04-03	-0.608923	-0.0335963	-0.0222512	0	0	1.39544
2015-04-07	-0.0798401	1.32663	2.30696	1.12616	2.17937	1.96142
2015-04-08	-5.9225	-1.05681	-6.26495	-0.251025	0.400919	-0.154327
2015-04-09	-7.44454	0.164669	0.153542	0.618059	0.297215	-1.25188
2015-04-10	-5.04767	0.0707991	1.29775	0.531474	0.0424937	1.65715
2015-04-13	9.30968	0.698214	0.429125	0.314232	0.3898	2.01243
2015-04-14	-1.71071	1.17098	1.50444	0.609106	0.318743	1.92633
2015-04-15	-6.85445	1.02645	4.36949	1.78925	-0.592337	-1.89756
2015-04-16	-2.94525	0.424676	0.0182802	0.562657	-1.28802	3.60725
2015-04-17	8.94784	-0.408595	-0.887025	-1.92609	-2.65013	2.86265
2015-04-20	-4.12708	0.118473	0.790578	0.943403	1.9486	-0.0462622
2015-04-21	-1.18413	-0.671508	-1.51307	-0.845396	0.945575	1.244
2015-04-22	-4.75819	-0.450916	1.71815	0.130527	-1.08617	2.66099
2015-04-23	-2.74577	0.662238	2.03407	1.05426	-1.54583	2.01948
2015-04-24	-2.33282	-0.0518059	-1.13078	-0.793719	1.92461	0.273833
2015-04-27	5.74449	0.794388	-0.656162	-0.489078	1.09333	1.769
2015-04-28	-5.66757	0.135288	-0.32953	1.47622	-0.236338	-3.08988
2015-04-29	6.57966	0.657904	2.4175	-0.727276	-0.802454	1.42932
2015-04-30	8.29499	0.558834	1.74679	-2.5297	0.99082	0.287155
2015-05-04	-0.377178	-0.21517	-0.225818	0.613651	2.08713	1.85566
2015-05-05	10.1787	1.61833	1.6299	-1.71771	0.0102792	-3.39031
2015-05-06	6.05106	0.404486	0.850124	-1.30367	3.60023	-2.37495
2015-05-07	-0.00482462	-1.85308	-1.74549	-0.341414	1.07426	-3.33867
2015-05-08	-16.5741	-0.0938146	-0.109154	1.34185	0.887295	2.46049
2015-05-11	5.64813	-0.602792	0.583221	0.973816	0.834047	3.98088
2015-05-12	0.0396793	0.256276	2.26535	-0.217446	-0.0213521	2.77344
2015-05-13	-1.16645	0.267329	-0.724581	0.317646	0.505714	-0.677957
2015-05-14	-8.24313	-0.787268	-0.834769	0.979993	0.588376	1.23903
2015-05-15	-4.03793	-0.394791	-0.222855	0.494642	1.20754	-0.978013
2015-05-18	1.88289	-0.745581	0.293303	-0.494642	0.924698	0.266619
2015-05-19	0.507468	-1.34627	-2.5512	-1.98654	-1.5534	2.31213
2015-05-20	-0.284726	-0.254887	3.14575	-0.185638	0.510152	1.35733
2015-05-21	-6.73699	0.248	2.29811	0.874543	0.890392	2.62149
2015-05-22	-0.969759	-0.865641	-0.988296	-0.150817	-1.1036	1.59288
2015-05-25	-0.709859	-0.503239	0.375582	0	-0.910541	3.47398
2015-05-26	14.0744	-0.787442	-1.4182	-1.28272	-0.63247	3.30824
2015-05-27	-5.17612	-0.656071	-0.644792	0.525202	1.15118	0.875098
2015-05-28	-0.586638	-0.429168	0.614045	0.219428	0.0284748	-6.43383
2015-05-29	3.35772	-0.563498	5.09862	-0.8126	-0.166896	0.994049
2015-06-01	0.733576	-0.493715	0.282724	0.407125	-3.48493	5.04881
2015-06-02	1.53425	1.23166	0.756821	0.405474	2.40356	1.93141
2015-06-03	-4.45188	-0.705969	-2.34106	0.134794	2.53871	-0.202641
2015-06-04	6.61307	-0.693112	-1.83717	-1.44156	-1.29994	0.453351
2015-06-05	-3.3325	-0.843278	2.44956	1.7106	-2.38334	1.98682
2015-06-08	6.67212	0.398965	-1.67226	-1.06357	-1.82942	0.896091
2015-06-09	-5.32602	-0.00770992	3.07195	-1.17799	0.510641	0.5505
2015-06-10	-9.80758	0.731836	0.924291	1.29673	4.07969	-1.60352
2015-06-11	-4.07111	-0.794665	-0.643552	0.625266	-1.3059	0.0709472
2015-06-12	6.13409	-0.530031	-0.557773	0.13468	-0.696948	0.672584
2015-06-15	11.0457	0.531054	-0.587486	0.0840831	-2.36147	-1.44919
2015-06-16	-3.32552	0.0724417	0.486834	0.0336134	2.32287	-4.06286
2015-06-17	-2.70803	-0.0579885	-0.202934	-0.117697	-0.805596	1.95342
2015-06-18	-10.0471	0.0160017	0.284158	0.871027	1.71411	-4.10409
2015-06-19	4.42046	-0.168286	-1.02257	-0.0667334	-0.3106	-6.55566
2015-06-23	-6.3172	-1.05532	2.73819	0.830984	2.76993	1.71591
2015-06-24	7.96802	0.935355	-1.59202	-1.4336	-0.880963	2.54239
2015-06-25	5.5762	-0.427055	-0.286061	-0.538722	1.05876	-3.91903
2015-06-26	0.0502617	-0.36909	0.185813	-0.745513	-0.310512	-8.99789
2015-06-29	29.1779	0.64576	-1.13245	-4.06094	-3.13867	-6.4779
2015-06-30	-1.20558	-0.31787	2.12394	0.212314	0.150013	5.43606
2015-07-01	-12.6227	-1.75976	-3.52807	-1.20912	3.39625	-6.32717
2015-07-02	3.10514	0.937445	-0.700061	-0.718136	-0.103075	-6.58996
2015-07-03	0.060676	-0.6504	0.545423	0	-0.438755	-6.72851
2015-07-06	1.13943	-1.24635	-6.92558	-2.96237	-1.62771	-1.01152
2015-07-07	-5.62478	-1.77561	0.810514	-0.595683	-3.22341	-5.17867
2015-07-08	19.3981	1.36993	-1.40924	-4.17482	0.741518	-5.84966
2015-07-09	3.04794	0.899957	1.54582	1.33426	2.83921	6.00017
2015-07-10	-16.7985	-0.164699	-0.897294	1.90264	5.52691	5.77166
2015-07-13	-20.5215	-1.67509	-0.762613	1.38501	1.15502	5.24311
2015-07-14	-5.83206	0.251602	1.0349	0.445105	0.237118	-0.35067
2015-07-15	-1.97741	-0.909383	-2.46822	-2.11322	1.03919	-5.85805
2015-07-16	-9.5032	-0.59849	-1.01519	0.490197	0.767714	2.55011
2015-07-17	-2.66746	-1.27971	0.893178	-0.755148	-1.49728	5.53401
2015-07-20	1.62352	-0.612848	-0.863608	-0.246656	1.37937	1.54565
2015-07-21	-0.750775	0.143589	0.23539	-0.304414	-0.281081	1.27728
2015-07-22	-1.50478	-1.20241	-1.41915	-1.20772	1.58837	0.722025
2015-07-23	3.45069	-0.526065	-0.886267	-0.716155	0.00551614	2.59544
2015-07-24	8.01828	-1.10825	0.74513	-1.66491	-0.682013	-1.61569
2015-07-27	12.8255	-0.39447	-0.525717	-1.45233	-1.92016	-8.98962
2015-07-28	-14.2375	0.300103	0.160714	1.94489	0.510737	-3.09599
2015-07-29	-8.78366	1.08593	0.229525	2.52294	0.843198	5.8249
2015-07-30	-4.24339	0.00362117	-0.813867	-0.480262	-6.13917	-2.407
2015-07-31	-1.03217	-1.42902	-1.77499	-0.618121	0.978417	-1.046
2015-08-03	2.85039	-1.49298	-2.79994	-1.6016	0.368522	-2.80355
2015-08-04	3.06381	-0.272392	1.64379	-0.671674	-1.81324	5.47825
2015-08-05	-4.15589	-0.14766	-1.42232	1.39752	0.500608	-1.06671
2015-08-06	8.6979	0.745462	-1.25862	-1.57608	-0.20999	1.08677
2015-08-07	-2.61589	-0.578326	-1.45201	-2.08675	-1.59854	2.56047
2015-08-10	-9.7486	0.529661	1.43326	1.34933	2.16674	5.47008
2015-08-11	10.0823	0.218821	-3.90839	-2.32733	-1.48795	0.312472
2015-08-12	-0.45446	0.81196	-0.230677	1.30189	-2.17503	-0.738842
2015-08-13	-1.39058	-1.2301	-1.54042	-0.893226	2.52534	2.94531
2015-08-14	-5.60266	-1.05235	1.20911	0.751654	0.227772	0.284921
2015-08-17	0.502225	-0.441087	-1.103	0.484556	-0.402105	1.59039
2015-08-18	5.24649	-0.506354	2.48915	-1.21582	0.481669	-8.45912
2015-08-19	9.99536	-1.34331	-2.66382	-2.89576	-0.767781	1.99007
2015-08-20	23.1459	1.1476	1.13072	-3.63288	-7.64498	-4.50698
2015-08-21	39.8686	0.426681	0.170733	-3.52157	-2.79709	-4.81522
2015-08-24	40.8916	-1.87129	-1.72426	-3.55664	-0.597865	-8.94376
2015-08-25	-8.19765	0.0222304	2.26204	0.233318	6.36189	-8.61669
2015-08-26	-16.8859	-0.923204	-1.99736	0.348959	0.0174952	-3.93942
2015-08-27	-15.5331	2.92796	6.35883	4.25112	1.97877	4.99393
2015-08-28	-0.856072	1.85721	4.4017	1.93967	-0.852939	6.45759
2015-08-31	9.15089	1.07767	8.00808	0.261609	-0.426434	-0.553982
2015-09-01	11.2045	-1.87339	-5.79223	-2.62505	-2.14639	-4.07619
2015-09-02	-16.9626	-1.90057	2.49366	1.00079	0.73563	-1.88646
2015-09-07	1.18501	-0.133449	0.164585	-0.110705	-2.7377	-0.87771
2015-09-08	-10.3647	0.53581	-1.30013	2.49411	1.66357	3.64933
2015-09-09	4.84959	0.298638	-3.97459	-0.389695	1.10584	3.16168
2015-09-10	-6.51891	-0.980787	4.38948	-0.173687	0.440059	-1.65217
2015-09-11	-5.02355	-1.1784	-2.13673	0.325415	-0.821931	0.197237
2015-09-14	4.36107	0.242552	-1.40125	-1.48377	0.298	-4.90674
2015-09-15	-6.62608	0.19765	0.772147	1.24524	-0.274664	-6.06174
2015-09-16	-5.64865	2.12547	3.42125	1.6152	0.185781	7.08891
2015-09-17	-1.22029	-0.191337	-0.452788	0.787322	0.022581	-1.70654
2015-09-18	5.33051	-1.6884	-3.11507	-2.8813	-1.68923	1.2201
2015-09-21	-9.4637	-1.40807	5.03894	0.717316	-1.59349	3.07308
2015-09-22	10.2177	-1.37761	-0.0953544	-2.32263	-3.94859	0.20067
2015-09-23	-0.388208	-0.421873	-2.66614	-1.67658	1.33359	-1.72468
2015-09-24	6.08456	-0.0922848	1.36727	-0.157924	-3.80236	1.16668
2015-09-25	1.40232	1.1673	0.803002	-1.70789	2.82236	-3.19145
2015-09-28	16.1123	-0.831929	-1.21284	-3.48207	-2.68562	1.37389
2015-09-29	-1.20134	0.559013	1.21978	-1.07592	3.8436	-2.43752
2015-09-30	-8.65905	1.19148	-1.83827	2.46926	2.67225	1.17705
2015-10-08	-5.89807	0.421759	2.62087	13.0831	10.1057	3.86228
2015-10-09	-2.51652	0.381365	-0.0824351	0.410678	1.82295	2.56344
2015-10-12	-5.80137	-1.18265	-4.55969	-0.82305	-2.86722	2.56921
2015-10-13	8.2246	-0.420982	-0.130437	-1.12197	-0.0571543	1.24646
2015-10-14	2.52678	0.635902	-0.463741	-0.376806	-1.05724	-0.97177
2015-10-15	-11.5111	-0.110906	-1.12891	1.93172	1.56847	2.50926
2015-10-16	-7.50867	0.0886599	1.36367	-1.80597	-0.780162	1.1965
2015-10-19	-1.34196	-1.83177	-1.46025	0.104679	0.570946	0.638543
2015-10-20	4.5817	0.284071	-0.746493	-0.629725	1.02468	1.35586
2015-10-21	5.93285	0.0357749	-0.484746	-2.66739	1.17391	-5.93271
2015-10-22	-14.2114	-0.0570389	-0.370823	0.689658	-1.33607	2.80416
2015-10-23	-1.3567	-0.503631	-1.39428	0.556866	0.0945745	1.77198
2015-10-26	5.09817	-1.10678	-0.178609	-0.0427259	0.673875	1.09048
2015-10-27	0.982284	-1.5469	-0.421841	-2.68531	-1.28889	0.438873
2015-10-28	-7.61333	0.986436	4.85638	3.13302	1.24585	-1.7696
2015-10-29	0.9805	-0.369675	0.616902	-0.597399	-0.0065235	0.631183
2015-10-30	2.80308	0.655009	0.72238	-0.600989	0.96217	-0.632757
2015-11-02	-6.4175	1.05211	-2.25282	1.74994	1.56679	-2.22697
2015-11-03	1.83354	2.91278	1.32731	1.49084	-1.38475	-0.299812
2015-11-04	6.21677	0.0836192	-3.09268	0.291363	-1.90515	4.2455
2015-11-05	-2.83719	-1.68336	-1.17795	-1.69762	3.47547	1.10811
2015-11-06	-5.43579	-1.84204	-0.77412	0.50601	0.32201	2.00254
2015-11-09	13.4266	-0.123126	-0.107603	-2.40514	0.190309	1.50185
2015-11-10	-6.94396	-0.752627	1.01075	-3.30699	-0.493909	0.475685
2015-11-11	4.10185	-0.310086	-2.45737	-1.7974	0.72798	0.689798
2015-11-12	13.5079	-1.25261	-0.966894	-2.89809	-0.623295	0.370109
2015-11-13	9.85392	-0.478533	-1.49955	-0.0233399	-1.3901	-1.14135
2015-11-16	-9.23539	1.03946	0.994842	1.91891	2.12802	1.05799
2015-11-17	2.94655	1.39477	-3.64617	-3.23472	0.937262	-0.649035
2015-11-18	-10.9469	-0.0434764	-0.39953	2.03683	0.233571	-2.02769
2015-11-19	-0.136199	0.195843	-0.70943	-1.00152	0.0870604	2.2768
2015-11-20	-9.53183	-2.00859	0.801399	0.908779	-0.53725	0.577414
2015-11-23	-0.0190685	0.147763	3.16687	0.231696	0.0487332	-0.789096
2015-11-24	1.69212	0.989252	1.8758	1.69807	-0.551193	0.519821
2015-11-25	-4.87586	-0.873736	0.855029	0.136426	-1.02271	1.11209
2015-11-26	-0.669428	0.420822	-0.416096	0	-0.448356	-0.582966
2015-11-27	-0.823149	-1.12958	-2.23155	0.566445	2.70142	-6.28921
2015-11-30	6.08703	0.466565	-0.218798	0.832494	1.42969	0.807986
2015-12-01	-9.26672	-0.482028	0.354439	2.21591	0.260812	-0.046234
2015-12-02	7.07264	-0.855679	-3.5546	-0.0219178	0.465569	1.10128
2015-12-03	13.2248	-0.0544952	3.58919	0.0438308	0.870527	1.6253
2015-12-04	-19.2042	-2.61577	-1.59024	0.459067	0.963216	-1.1728
2015-12-07	4.96764	-2.70498	-3.39252	-1.5828	0.370707	1.13471
2015-12-08	10.6486	-0.531953	0.667475	-0.756231	-0.942246	-2.30103
2015-12-09	11.4958	2.57039	-2.51527	0.844825	1.2589	0.711759
2015-12-10	-0.48561	0.0859375	-1.20027	0.221141	-1.57958	-0.886879
2015-12-11	23.2027	-0.704476	-1.25495	-1.71554	-2.71678	-0.872799
2015-12-14	-4.97358	-0.916643	2.40922	2.17835	0.936271	2.26758
2015-12-15	-8.24612	2.12067	0.520607	1.938	1.45578	0.260095
2015-12-16	-16.4071	-1.46537	-4.70559	6.14742	3.46166	0.102347
2015-12-17	4.59211	-1.00239	-0.514664	-0.855402	0.469303	2.1384
2015-12-18	9.23031	-0.028898	-0.103557	0.855402	-0.496703	-0.404949
2015-12-21	-9.34765	-1.73761	0.978423	2.64174	0.129939	1.25636
2015-12-22	-12.6073	-0.0200661	3.24117	-1.85394	-0.0122292	0.641213
2015-12-23	-7.51265	2.89991	0.762487	1.16025	0.476995	-0.986176
2015-12-24	0.259194	-0.0482539	1.62657	0.950126	0.964441	-0.547367
2015-12-25	-0.241582	-0.161937	0.108709	0	0	0.321394
2015-12-28	6.89172	-0.603916	-2.55423	-1.2489	-0.840482	-2.52628
2015-12-29	-4.68446	-0.00752169	2.56476	-0.379735	1.04922	0.941257
2015-12-30	6.68246	-0.824057	-2.3435	-0.300812	-0.650577	0.636302
2015-12-31	5.54962	0.0217808	1.47206	-0.766133	-0.790738	-1.2189
2016-01-04	12.7935	-0.102031	0.0326253	-1.46792	-1.24502	-8.75893
2016-01-05	-5.7214	-0.456517	-2.11934	-1.32315	-0.10362	-0.722772
2016-01-06	5.88231	-1.69402	-3.95074	-2.08188	-1.1279	2.62739
2016-01-07	19.9274	-0.196522	-0.807736	-6.67793	-1.77487	-8.85008
2016-01-08	9.64364	-0.987818	1.04391	-0.386936	-1.11041	1.84402
2016-01-11	-9.34314	-2.94734	-3.4325	-1.86448	-2.12939	-6.71427
2016-01-12	-8.1441	-0.817936	-2.90964	-1.73428	2.37681	0.728338
2016-01-13	11.2052	1.06355	-0.168175	-4.00343	-1.04527	-3.28784
2016-01-14	-3.9221	2.42317	0.015012	0.857533	-2.55668	3.33236
2016-01-15	12.1224	-1.66413	-3.77854	-3.07183	-7.28615	-3.64343
2016-01-18	1.41208	-0.798688	0.74895	0	1.13456	1.1187
2016-01-19	-3.02854	-0.530469	-3.04913	-2.16156	6.0577	3.79958
2016-01-20	5.99257	-3.7956	-3.36509	0.359251	-4.92853	-1.05986
2016-01-21	-2.32314	1.83913	8.90984	1.77715	-1.17503	-4.14766
2016-01-22	-17.4551	3.31511	4.77659	3.48657	3.40756	1.46958
2016-01-25	6.75958	-1.68079	-4.11084	-2.70953	1.19969	0.760135
2016-01-26	-6.22075	1.65777	1.80164	2.53927	0.756072	-7.77815
2016-01-27	2.47745	0.785649	2.11451	-1.32322	1.21197	-1.23212
2016-01-28	-2.55267	2.43247	0.557907	0.565738	-1.64258	-4.40543
2016-01-29	-10.3611	0.380022	0.269983	2.66231	4.16449	3.74913
2016-02-01	-1.75253	-1.66337	-4.81949	-0.646941	0.171094	-1.72109
2016-02-02	9.49746	-2.9991	-2.56509	-3.00132	-2.60271	2.99232
2016-02-03	-0.592702	2.32922	5.67437	1.32876	0.892218	0.113468
2016-02-04	1.03262	2.98908	-4.27693	1.5523	0.312899	1.90286
2016-02-05	7.1044	-0.367643	-1.95228	-2.85629	-1.68149	-1.08468
2016-02-15	-0.234593	0.826567	-0.740221	-7.34605	0.903372	-0.273748
2016-02-16	-4.79523	-0.256118	-1.43486	3.4834	-1.42027	3.63278
2016-02-17	-7.75195	2.28265	3.01377	2.34048	2.84048	1.29881
2016-02-18	-3.37121	-0.79655	0.835827	-0.403125	0.125696	-0.287926
2016-02-19	-5.311	-1.59698	-2.68537	-0.760267	-1.12886	0.175116
2016-02-22	-6.0285	1.80843	4.11258	1.48974	1.4131	2.16653
2016-02-23	7.5326	-1.75905	3.1501	-1.4643	0.747529	-0.635983
2016-02-24	-0.538524	-1.10525	1.77722	1.41416	-2.25267	1.09614
2016-02-25	-7.98969	0.257634	2.13321	2.62326	2.04422	-7.93413
2016-02-26	3.03326	1.35582	-1.8917	0.948105	0.633202	0.361194
2016-02-29	3.96296	0.4072	2.77271	1.6795	0.521893	-4.59418
2016-03-01	-14.5127	0.122251	0.968334	0.118892	2.14214	1.94271
2016-03-02	-4.66053	1.11898	-0.487778	2.83491	-1.22721	4.84388
2016-03-03	-2.79102	1.40727	-1.64316	-0.648901	0.790991	0.107029
2016-03-04	0.574429	1.46793	2.58508	-0.1396	-1.25798	-1.15205
2016-03-07	2.74617	1.63225	4.10111	1.20344	-0.132357	1.63271
2016-03-08	7.41456	-1.2982	-2.24767	-1.95128	-1.97212	0.306466
2016-03-09	-1.25286	0.75511	4.05147	0.794397	0.162091	-2.13176
2016-03-10	-1.72428	-0.848079	-0.56747	-1.52424	-0.28306	-1.81757
2016-03-11	-9.16661	0.699245	0.595232	1.8959	1.99568	0.112373
2016-03-14	1.64992	-0.506405	-2.97751	-0.115996	1.21063	2.62676
2016-03-15	-0.508673	-0.829439	-1.61801	-0.605357	-0.499442	-0.0821721
2016-03-16	-11.8371	0.189377	4.82371	0.186654	0.48748	-0.437472
2016-03-17	-4.93679	2.96376	1.58347	1.38891	3.3555	2.44241
2016-03-18	-3.69913	-0.294804	-1.88052	0.114877	-0.776339	2.51756
2016-03-21	-2.35371	-1.1039	1.98372	0.34384	-1.28422	2.15314
2016-03-22	2.0933	0.206182	3.71003	-1.22023	-0.344827	-0.107849
2016-03-23	5.03174	-1.50924	-2.52389	-3.39255	-0.363263	0.36524
2016-03-24	-1.3154	-0.629602	-0.382766	0.239349	-0.741292	-1.42333
2016-03-25	-0.45224	-0.0578125	0.00738055	0	0	0.609152
2016-03-28	2.94686	0.688556	-0.62	-0.695697	0.461417	-0.439938
2016-03-29	-9.87222	-1.49402	-2.14764	0.934474	-0.375786	-1.55934
2016-03-30	-3.07196	2.05561	-1.8516	0.0476872	4.0022	3.19038
2016-03-31	2.13345	-0.351214	0.457288	-0.0238407	-0.780541	0.255434
2016-04-01	-6.56627	-2.55164	-2.32106	0.238152	-0.791355	-0.0829069
2016-04-05	8.86451	-1.03311	1.90092	-1.46163	-2.14341	2.27415
2016-04-06	-8.66096	0.408667	4.1969	1.03255	0.896606	0.28369
2016-04-07	12.6515	0.73469	-1.24199	-1.56498	-1.51445	-1.44435
2016-04-08	-4.37269	2.14594	4.28654	0.169718	1.76789	-0.921804
2016-04-11	5.07773	0.960367	1.04247	0.483326	-0.0383586	1.67512
2016-04-12	-8.9122	0.875874	3.11564	0.600891	-1.03353	-0.824491
2016-04-13	-8.0417	0.803151	-2.13685	1.92245	-0.801755	1.40882
2016-04-14	-1.90733	-0.289412	-0.500138	0.305129	1.04835	0.686705
2016-04-15	-1.33125	-0.87252	-2.12755	-1.24987	-0.741021	-0.267966
2016-04-18	-2.57043	0.1096	-1.70326	1.60079	0.295036	-1.12557
2016-04-19	-1.51537	1.96757	1.42299	-0.14022	1.83199	0.471725
2016-04-20	-0.321048	0.675451	3.08843	1.27805	-2.94123	-3.68708
2016-04-21	4.39121	0.571945	1.02102	1.03366	-1.26171	-1.01603
2016-04-22	-5.489	-0.0988362	1.02463	0.273848	-0.136548	0.576131
2016-04-25	5.38643	-0.442225	-1.85763	-1.81677	-0.573944	-0.528676
2016-04-26	-0.883682	0.983806	2.31867	1.61145	1.27491	1.04967
2016-04-27	-1.86993	0.972864	1.92905	0.909304	0.487405	-0.283952
2016-04-28	9.42011	1.19868	1.01629	-2.0115	0.816508	-0.361389
2016-04-29	3.48583	-0.22687	0.135185	-1.58253	4.16533	0.0467317
2016-05-03	5.22391	-1.74322	-0.780637	-2.27768	-3.82	2.47787
2016-05-04	2.95297	-1.05423	1.35268	-1.81625	-0.597296	-0.0154146
2016-05-05	-0.892015	-0.182401	1.31555	-1.67574	-0.501596	0.341382
2016-05-06	-8.0844	-0.541244	0.757089	-0.0497141	1.0486	-3.42366
2016-05-09	-1.97437	-1.68086	-1.45359	-0.823872	1.2053	-3.36967
2016-05-10	-7.1865	0.66587	1.77604	-1.74489	0.958573	-0.244471
2016-05-11	6.49334	0.98263	2.95971	0.0765013	0.64194	-0.516217
2016-05-12	-1.80955	-0.0429942	0.929722	-1.72263	-0.848422	0.932752
2016-05-13	3.75777	-0.692636	-0.264844	-0.0778311	-1.66082	-0.230251
2016-05-16	-2.47405	0.863295	2.31752	1.21245	0.548364	1.65538
2016-05-17	5.34295	0.430129	1.14335	-1.21245	-0.428432	-0.461486
2016-05-18	2.52638	-0.153813	0.00892957	0.207415	-1.08762	-2.16667
2016-05-19	2.29827	-1.80161	1.59831	0.0258967	-0.948535	0.604832
2016-05-20	-7.20962	-0.229907	-1.08034	1.82173	1.18758	0.616903
2016-05-23	3.1585	-0.731086	1.47796	1.28838	-0.724905	1.11122
2016-05-24	-9.28769	-0.0373008	0.608971	1.09836	1.1947	-0.544942
2016-05-25	-4.74091	1.25637	0.551585	0.519996	1.66626	-0.580751
2016-05-26	-4.22817	-0.439445	-0.0389487	-0.569661	0.282174	0.537926
2016-05-27	-3.13609	-0.677607	0.0851298	-0.12427	1.18927	-0.291311
2016-05-30	-0.754663	0.00345996	-0.0622987	0	0.114793	0.0695205
2016-05-31	7.25978	-0.68372	0.5122	0.471406	0.721675	3.73394
2016-06-01	0.191234	-0.381347	0.138138	0.123686	0.824394	0.502297
2016-06-02	-4.49292	-0.731621	0.684661	-0.272311	-0.219899	0.686375
2016-06-03	-1.97953	0.656644	-1.81738	-0.871411	1.27664	0.271299
2016-06-06	0.695746	1.52958	0.885022	2.10326	0.138781	0.215744
2016-06-07	2.47185	2.48733	-0.675364	0.610279	0.388239	0.115606
2016-06-08	-0.0310876	0.934054	0.891696	0.218792	-0.923548	-0.117106
2016-06-13	21.7652	1.23842	-0.242917	-5.56739	-7.30743	-4.04203
2016-06-14	-0.516284	-1.88245	0.770435	-0.592251	-2.919	0.45195
2016-06-15	-1.68649	-0.0668065	-1.04924	0.154839	1.46273	3.12397
2016-06-16	-3.92448	-0.74407	-3.41987	-0.232348	-2.35125	0.357216
2016-06-17	-0.0405086	1.79276	2.19935	0.721095	4.46269	0.133232
2016-06-20	-5.46621	1.90231	0.896698	1.50264	3.14486	0.26211
2016-06-21	0.160308	0.408489	-1.41762	-0.583092	-2.35624	-0.874372
2016-06-22	13.5738	0.899799	0.546155	-0.919547	2.21467	1.19297
2016-06-23	-19.3131	0.304387	0.608921	1.70466	1.68808	-1.07015
2016-06-24	38.5586	-1.37068	-1.72212	-4.19894	-8.39306	-1.24555
2016-06-27	-4.42434	-2.59788	-0.822222	-3.97154	-5.32008	1.90898
2016-06-28	-24.0404	0.0559988	1.80914	2.99335	3.76288	0.338111
2016-06-29	-13.7062	2.04323	1.61054	2.88053	3.21239	0.685656
2016-06-30	-7.44572	0.325553	-3.87268	2.74966	2.21415	-0.166438
2016-07-01	-6.47565	-0.061144	1.02735	0.100402	1.33184	-0.27862
2016-07-04	-0.827341	-0.0844005	0.00909761	0	-2.05653	2.08823
2016-07-05	4.92546	-0.773021	-4.07678	-1.61865	-1.79226	1.05451
2016-07-06	-3.97536	-1.21698	2.57034	0.96423	-2.24967	-0.00416713
2016-07-07	-1.97152	-0.0647073	-5.02089	-0.379507	0.480264	0.494832
2016-07-08	-11.6687	-0.424823	0.287309	1.93303	0.938655	-0.510701
2016-07-11	1.17218	0.903447	-2.16879	1.2846	3.05579	0.0730714
2016-07-12	-0.319453	1.62428	3.02643	1.00135	0.989784	1.50983
2016-07-13	-4.33799	-0.863213	-3.99866	-0.829678	-0.075698	0.586658
2016-07-14	-2.55311	0.511688	1.45665	0.269179	-0.0258465	-0.096046
2016-07-15	-1.92248	-0.573845	0.957274	-0.391773	-1.18162	0.102477
2016-07-18	-2.54841	-0.62796	-1.17803	1.38874	-0.0176424	-0.327731
2016-07-19	-4.64023	-1.03571	-0.701025	-1.29065	-0.0285995	0.324123
2016-07-20	-2.683	-0.432516	0.851075	1.50818	1.49862	-0.275194
2016-07-21	7.04016	0.450733	-0.431239	-0.556835	-0.620039	0.122297
2016-07-22	-5.86927	-0.954225	-0.786824	-0.0728597	0.159737	-0.741733
2016-07-25	5.75067	-1.28135	-1.01995	0.484732	-0.732666	-0.0454331
2016-07-26	1.25738	-0.126436	-0.325454	0.506452	0.810333	1.30269
2016-07-27	-2.14075	-0.69729	-1.89577	-0.0962696	1.49278	-3.51977
2016-07-28	-1.57526	-0.871131	-1.23528	-2.0188	1.03226	0.428573
2016-07-29	-7.6014	-0.585265	1.16982	0.490197	0.0862264	-0.949755
2016-08-01	3.46312	-2.03562	-1.84494	0.536456	-0.61577	-1.16709
2016-08-02	6.86117	0.256647	-1.23333	-1.17418	-1.50081	0.781802
2016-08-03	-3.884	0.227319	2.85543	1.1012	0.850947	0.324892
2016-08-04	-4.31988	0.23493	2.19646	-1.17504	2.28299	0.520524
2016-08-05	-9.57822	-0.577328	-0.37079	1.41812	-0.729881	-0.529155
2016-08-08	-0.470798	1.05751	1.92493	0.773885	-0.190774	1.24227
2016-08-09	0.630977	0.178805	-0.71773	-0.555624	2.16707	0.713495
2016-08-10	2.64009	-0.690331	-1.78459	-2.92512	-0.475737	-0.334158
2016-08-11	-3.57367	0.586421	3.45705	0.124642	0.180104	-1.24954
2016-08-12	-2.07477	0.232364	1.94001	0.397813	0.177485	1.30433
2016-08-15	1.36417	0.690477	2.23763	1.25757	0.900361	2.1133
2016-08-16	6.21429	0.980804	1.3103	-1.43142	-0.524606	0.403394
2016-08-17	-3.74879	-0.397213	0.563142	-0.698431	-0.628004	0.213867
2016-08-18	-7.34374	0.428973	2.21141	1.56467	6.58016	-0.158289
2016-08-19	-2.05365	-1.18451	1.50547	0.0246396	0.347387	0.583881
2016-08-22	6.99505	0.00466081	-2.70335	-0.717026	3.0926	-1.31431
2016-08-23	0.782824	0.288691	1.98636	0.470356	-0.59615	-0.0665253
2016-08-24	7.73784	0.338952	-2.67624	-1.56817	0.168974	0.147774
2016-08-25	1.40747	-0.114503	1.35107	0.225536	0.0203832	-1.08031
2016-08-26	-0.219797	0.409134	0.272111	0.574069	0.719626	0.0688939
2016-08-29	-5.82514	-1.0761	-0.815409	0.198906	-1.55296	0.0299874
2016-08-30	0.409724	0.128247	-1.454	-0.0248416	0.639792	0.0810319
2016-08-31	1.76595	-1.09639	-2.60011	-0.923506	-0.966516	-0.00110958
2016-09-01	0.0833928	-0.505987	-3.08331	0.400401	0.812983	-0.644684
2016-09-02	-12.2763	0.542909	1.74783	1.24102	0.878708	0.0274368
2016-09-05	-1.55627	0.410925	-0.457544	0	0.74885	0.158571
2016-09-06	-0.43756	0.680489	0.247616	0.541207	0.382612	1.31619
2016-09-07	-1.35188	0.413509	1.03522	-0.368687	0.482482	-0.0490457
2016-09-08	3.90265	1.27805	3.65894	-0.345338	-0.445997	0.14785
2016-09-09	33.2591	0.47295	-2.27223	-2.95909	-1.16899	-0.608512
2016-09-12	-12.0241	-1.2288	1.25139	0.937309	-0.462674	-2.51144
2016-09-13	15.1383	-1.0621	-1.30042	-2.94252	-0.0548499	0.316977
2016-09-14	2.64273	-0.436403	-2.47696	-1.62307	-0.0360606	-0.683561
2016-09-19	0.23807	0.724273	-0.00019895	1.33702	0.735359	0.919026
2016-09-20	2.21762	-0.637892	0.978969	0.182126	0.124454	-0.162508
2016-09-21	-18.0628	-0.796956	3.93144	1.39393	-1.00262	0.266838
2016-09-22	-11.9477	0.661708	0.880111	1.87918	2.22899	0.449562
2016-09-23	0.694048	-0.786793	-3.35513	-0.0251604	-1.22015	-0.542134
2016-09-26	15.9673	0.622133	3.55588	-0.707074	-0.311927	-2.06793
2016-09-27	-9.36354	-1.93701	-1.66157	1.20908	-1.42665	0.419576
2016-09-28	-6.78537	1.55943	3.452	1.29355	0.89972	0.0181741
2016-09-29	11.2544	3.04509	-0.355051	-1.16844	0.728935	0.0998167
2016-09-30	-4.95136	-0.30728	0.821863	0.6729	-0.242562	0.385078
2016-10-10	-0.925803	1.59159	1.60845	0.767046	-0.83606	1.79694
2016-10-11	13.2363	-0.0798991	-0.299185	-1.9162	-4.21844	0.330699
2016-10-12	4.19178	-0.278496	-0.749729	-0.529035	-0.65085	-0.104683
2016-10-13	4.84831	-0.222639	0.964348	-0.278235	-1.03045	0.275674
2016-10-14	-3.29519	0.151354	-0.511053	-0.329824	2.05638	-0.0383797
2016-10-17	0.0894096	-0.622749	-0.29435	-0.407436	0.0866091	-0.677809
2016-10-18	-6.11966	0.136056	0.21999	0.838526	0.503459	1.86094
2016-10-19	-6.61421	0.184666	2.02351	1.53173	1.04228	-0.0749548
2016-10-20	-5.56168	-0.72068	-2.00441	0.149402	-0.760967	0.0988782
2016-10-21	-3.89145	-0.546605	1.06303	-0.373925	-0.156786	0.115758
2016-10-24	-3.2139	-0.0608252	-0.796663	-0.174978	0.00811568	0.886225
2016-10-25	2.5521	0.00578574	-0.992706	-1.25883	-1.02178	0.137635
2016-10-26	5.33247	0.25775	-1.51149	-0.508002	0.0732148	-0.728936
2016-10-27	7.55588	1.05904	0.590855	-1.28141	-0.0863336	-0.0636512
2016-10-28	5.52021	0.15596	-1.91272	-0.750813	-0.149347	-0.833546
2016-10-31	5.41906	-0.475979	-3.15409	-0.835078	0.716798	-0.103476
2016-11-01	8.68058	1.13875	-0.912595	-1.02727	-1.64025	0.6633
2016-11-02	4.62787	-0.880901	-1.89048	-0.610811	-2.83742	-0.856299
2016-11-03	13.7292	1.01855	-1.62981	-1.90943	-1.75418	0.79794
2016-11-04	3.1654	-0.239786	-0.962402	0.0542888	-0.278071	-0.306827
2016-11-07	-17.9994	-0.105786	0.903839	1.77519	2.42655	0.268426
2016-11-08	-1.16808	0.387327	-0.215114	1.16619	-6.51593	0.435074
2016-11-09	-26.5751	-2.07129	0.908674	-1.80808	-7.65035	-0.820364
2016-11-10	0.133931	-0.589113	-0.85974	0.374933	-2.96355	1.28741
2016-11-11	-4.28984	-2.82397	-0.670925	1.98498	1.16517	0.998204
2016-11-14	1.43672	-0.800509	0.544362	0.496668	-2.03177	0.345668
2016-11-15	-8.25195	1.32658	3.96739	0.104248	1.56706	0.0290852
2016-11-16	1.48206	-0.29769	-0.202848	-0.313071	-0.401863	0.0847452
2016-11-17	-3.08523	-0.124858	-0.413022	-0.235448	1.11269	0.220677
2016-11-18	-4.54296	-0.871737	1.06899	0.0261883	-1.55655	-0.424279
2016-11-21	-4.2915	1.91966	1.95605	-0.235942	0.474671	0.661305
2016-11-22	-0.999463	0.177606	0.904951	0.966443	-1.76636	0.479228
2016-11-23	-0.517872	-0.277865	0.0469047	1.13726	0.771465	-0.4601
2016-11-24	-0.641282	0.17914	-0.206857	0	4.16516	-0.0661205
2016-11-25	-1.37701	-0.509931	-3.69849	0.691513	1.08104	0.454917
2016-11-28	5.6428	-0.255932	2.71124	-0.845834	0.287807	0.199613
2016-11-29	-2.02763	-1.34871	-2.98098	-1.73963	0.45852	0.773061
2016-11-30	2.58098	3.32552	6.17118	0.0785443	-0.89922	-0.511018
2016-12-01	5.09001	1.76305	1.97922	-1.63592	-1.82176	0.525205
2016-12-02	0.304231	-0.139045	1.32673	-0.239712	-2.10198	-1.49124
2016-12-05	-15.5046	-0.732382	-0.0482245	2.50178	0.780578	-1.09727
2016-12-06	-4.69893	-0.234366	-1.75461	0.467048	-1.56258	0.0896313
2016-12-07	2.55788	1.24295	-3.24466	2.78257	0.493407	0.769926
2016-12-08	2.93856	0.63203	1.73276	-0.100756	-4.19251	-0.512162
2016-12-09	-7.66505	-0.405368	1.18958	0.226558	-2.38404	-0.0324158
2016-12-12	6.05473	2.47852	0.744397	-1.3926	0.248193	-4.02238
2016-12-13	0.495483	1.14934	-0.692899	-0.204186	2.0295	0.366899
2016-12-14	3.09478	-0.768127	-2.91302	-1.54483	0.79485	-1.03791
2016-12-15	-3.36998	-1.12172	0.482478	0.517599	-1.17147	0.161835
2016-12-16	-5.53155	0.21949	1.42862	0.797022	1.63638	0.574088
2016-12-19	-5.13499	-0.85415	0.850838	1.67602	-0.590688	-0.324171
2016-12-20	-3.31152	-0.0511042	0.0513981	0.0755192	0.498709	-0.239095
2016-12-21	-2.54972	-0.247837	0.549073	-1.13882	1.51137	0.913922
2016-12-22	0.477339	0.0938226	0.801993	-0.869126	0.990087	0.406037
2016-12-23	-0.602689	-0.198832	0.252184	0.128287	-0.216168	-1.12954
2016-12-26	-0.767995	-0.0301686	-0.0341559	0	0	0.35084
2016-12-27	3.91559	0.644037	1.29649	1.72856	0.992536	-0.219372
2016-12-28	7.33348	0.601874	0.17551	-1.9339	0.0475287	-0.37278
2016-12-29	3.18519	0.758523	-1.02703	-0.644415	0.884186	-0.260366
2016-12-30	4.62555	0.571519	-0.34037	-1.09205	2.10511	0.185351
2017-01-03	-9.28959	-0.00711048	-3.1555	1.55645	0.626795	0.874035
2017-01-04	-9.33727	-0.880427	1.9753	2.13912	0.150931	1.29357
2017-01-05	-2.88743	-0.139598	0.874901	-0.987475	1.4137	-1.32997
2017-01-06	-3.95152	-0.831762	0.902179	-0.152788	0.27985	0.810793
2017-01-09	1.06933	-1.2823	-2.6873	-0.690452	-0.195368	1.03614
2017-01-10	-1.23773	-0.0801955	-2.23605	1.0212	0.433986	-0.522981
2017-01-11	-2.83023	-0.163625	2.73935	0.506715	-0.189835	-0.695799
2017-01-12	1.50205	0.904039	0.735098	-1.22046	0.421578	-0.759112
2017-01-13	-3.32421	-0.414905	-1.06223	1.19518	0.399079	-0.75974
2017-01-16	-0.994279	-0.644899	0.481276	0	0.0916763	-1.73028
2017-01-17	4.71896	0.93808	-0.347204	-0.329156	-0.0659231	0.475662
2017-01-18	4.68677	0.070371	-2.51721	0.0507099	0.0558805	-0.0286792
2017-01-19	2.12126	-1.18533	1.68723	-0.71229	-1.70739	-0.372429
2017-01-20	-10.6138	-0.307616	1.67305	0.737635	1.43334	1.01874
2017-01-23	0.484666	-0.3123	0.906365	-0.661075	-0.434612	0.662226
2017-01-24	-6.77856	0.0587841	0.362734	1.19185	0.00316075	-0.117031
2017-01-25	-3.6449	0.0266704	-1.05689	1.25252	0.965656	0.335349
2017-01-26	-2.75226	-0.725614	2.3854	-0.524149	-0.363778	0.629334
2017-02-03	-9.03896	0.140628	-0.106574	-0.753583	6.00286	-0.413424
2017-02-06	2.13444	-0.545725	-0.962746	-0.454891	-1.4928	0.702384
2017-02-07	-1.28247	-1.40438	-0.479704	-0.941603	-1.58008	0.0984781
2017-02-08	0.570275	-0.405074	0.68867	-0.179143	1.78649	0.420795
2017-02-09	-5.78714	0.0268931	0.887217	0.204708	0.0443456	0.452934
2017-02-10	-1.4968	0.437648	1.13246	1.92411	-0.597921	0.446635
2017-02-13	1.09699	0.538208	-2.15924	1.12207	0.561367	0.35858
2017-02-14	-3.71757	-0.71622	0.897979	0.445325	0.526639	0.0863831
2017-02-15	9.75497	0.811171	-0.333651	1.0803	0.625247	-0.898092
2017-02-16	-1.71338	-0.745841	0.99712	-0.416005	0.958186	0.728239
2017-02-17	-3.132	-1.48837	1.16052	1.12169	-0.742162	-0.630707
2017-02-20	-0.946967	0.0864916	-0.144471	0	-0.326881	1.22886
2017-02-21	-0.0930412	0.760405	0.552977	2.60874	1.34506	0.448884
2017-02-22	0.744375	-1.05608	0.0592879	-1.78768	-0.381118	0.404419
2017-02-23	-0.887587	0.730682	0.89742	-0.0481116	-0.0305523	-0.135711
2017-02-24	-2.82582	-1.59046	0.342145	0.551891	-2.43819	-0.178799
2017-02-27	4.33731	0.577346	-0.15751	0.310596	-0.244767	-0.8571
2017-02-28	6.31394	0.222209	0.0738548	-1.95116	0.749288	0.557661
2017-03-01	-3.06993	0.986378	-1.37106	0.0486381	1.27217	0.293841
2017-03-02	-6.81315	-1.14363	-1.71043	0	-0.688544	-0.370909
2017-03-03	-8.64621	-0.804308	1.54653	-0.340965	-0.559061	0.446604
2017-03-06	1.10314	0.260978	-0.422981	-0.956007	1.38711	0.723124
2017-03-07	1.18246	-0.464193	0.335772	-0.246609	-0.157252	-0.0675856
2017-03-08	2.88222	-1.36616	-4.21293	-0.247219	0.0260287	-0.490824
2017-03-09	3.18245	-0.677148	-1.26467	-0.745345	-0.734357	-0.799713
2017-03-10	-5.72896	0.149654	-2.08416	0.423044	1.5068	0.209462
2017-03-13	-3.81055	-0.165861	-0.274717	0.544826	0.161277	0.756708
2017-03-14	7.02367	-0.715354	-0.421502	-0.544826	-0.315172	-0.161648
2017-03-15	-5.70516	0.494225	1.59805	1.62565	-0.210668	0.110067
2017-03-16	-4.79607	0.642317	-1.06422	1.19006	1.48633	0.778472
2017-03-17	-0.482198	-0.0231018	0.0373892	-0.508291	0.478254	-1.00758
2017-03-20	-0.249111	-0.226379	-0.990997	-0.145702	1.17202	0.470519
2017-03-21	8.74411	0.758657	-2.01798	-2.80945	0.0747583	0.378893
2017-03-22	2.73197	0.179201	1.45093	0.299476	-0.754708	-0.287587
2017-03-23	2.0317	0.21805	-0.799995	0.22402	2.47628	0.157697
2017-03-24	-1.60307	-0.676496	1.03858	0.372255	0.127763	0.662167
2017-03-27	-4.27407	-0.640526	-0.208782	0.568113	0.260065	-0.469319
2017-03-28	-8.98595	0.171616	0.661563	1.17533	0.171887	-0.291109
2017-03-29	-2.32941	0.273281	1.94666	0.315956	-1.12653	-0.157852
2017-03-30	0.148266	1.00849	0.807432	0.218155	1.10143	-1.39672
2017-03-31	6.24515	-0.464531	1.22936	0.771832	-5.38042	0.715818
2017-04-05	7.83716	1.05143	-0.24391	-0.409294	-1.34624	2.12331
2017-04-06	-3.93263	-0.0974848	0.914965	1.12752	0.601292	0.525941
2017-04-07	2.9048	0.0985145	1.10122	-0.310596	-4.24926	-0.0870351
2017-04-10	8.43231	0.819221	1.34942	2.59816	0.737861	-0.619923
2017-04-11	7.20066	0.60414	0.470729	0.673873	1.1911	0.680128
2017-04-12	4.74415	0.288101	-0.541696	-2.24834	-0.12935	-0.539799
2017-04-13	1.28738	-0.975789	1.02581	-0.97585	-0.098491	0.544954
2017-04-14	-0.146103	-0.228348	0.171148	0	0	-1.30784
2017-04-17	-8.74741	-0.284479	-1.2667	1.07055	0.35763	-0.42358
2017-04-18	-2.65529	-1.45773	0.629226	-0.450611	-0.39109	-0.587074
2017-04-19	2.89338	-0.840323	-2.96313	0.142518	0.578804	-0.855901
2017-04-20	-5.4911	-0.206927	0.38555	0.449971	0.649429	0.0317615
2017-04-21	2.51849	-0.28661	-1.80163	-0.449971	-2.12426	-0.318698
2017-04-24	-30.1654	-1.04789	-1.6046	2.02075	3.2354	-2.56927
2017-04-25	-3.75279	0.411939	0.0859533	1.11035	1.28278	0.549016
2017-04-26	-0.254796	-0.225227	0.283337	0.459032	0.0956071	0.291027
2017-04-27	-5.44067	-1.53009	-0.327221	0.274411	-0.85372	0.297506
2017-04-28	3.078	0.785597	0.214015	-1.21771	1.29537	-0.0898281
2017-05-02	3.19556	0.241504	-2.49005	-0.579577	0.926667	-0.09581
2017-05-03	0.24445	0.0561264	0.283874	-0.536194	-0.89807	-0.333099
2017-05-04	-2.88717	-1.23524	-4.04733	-1.64981	1.43445	-0.232628
2017-05-05	-0.0192518	1.32475	0.369953	2.64994	3.49971	-0.850189
2017-05-08	-8.71042	-0.335361	0.234032	0	-0.809744	-1.3585
2017-05-09	0.334973	-0.248475	-0.976113	0.645908	-0.101961	-0.156889
2017-05-10	1.57862	1.08489	2.25146	-0.437839	-0.277838	-1.62614
2017-05-11	2.9753	0.185324	1.0424	-0.486168	-0.116979	0.162459
2017-05-12	-2.5214	0.123537	-0.244075	-1.19063	0.693123	-0.0323373
2017-05-15	-0.854818	1.0028	1.16266	0.981546	1.04071	0.347826
2017-05-16	1.26123	0.328895	-0.618073	-0.70012	0.196142	1.71958
2017-05-17	37.3717	2.7878	0.531891	-3.6732	-2.42867	-0.0682838
2017-05-18	-3.68724	-1.97657	2.04276	1.15943	1.15381	-0.852725
2017-05-19	-20.3227	-0.933079	1.60657	1.28849	0.588068	0.2839
2017-05-22	-11.8108	-1.00488	1.75834	0.896867	0.358941	-0.745453
2017-05-23	-3.59536	-0.257389	0.664593	0	0.395725	-1.24758
2017-05-24	-7.83443	-0.878331	0.0826283	0.749067	-1.26394	0.414922
2017-05-25	-1.79008	-0.779715	-4.35594	0.488543	0.314005	0.658158
2017-05-26	-2.86999	-0.760472	2.29869	-0.18583	-0.312329	0.10063
2017-05-31	-0.238227	-0.869817	-2.01831	0.04649	-0.40581	0.339767
2017-06-01	-6.00255	-0.414055	0.0835937	0.463715	-0.486901	-1.01211
2017-06-02	-2.80067	-1.05522	-0.72597	0.207972	-0.810935	0.465832
2017-06-05	2.06824	0.25494	-0.666396	-0.811222	-0.232665	0.0182628
2017-06-06	2.94662	0.732094	1.17306	0.672622	2.37775	0.602625
2017-06-07	-1.21519	-0.816037	-4.64569	-0.138793	-0.191496	1.40784
2017-06-08	-3.19118	-0.595974	0.140369	2.62722	0.58004	0.491303
2017-06-09	4.04862	1.39026	-0.567864	-1.1338	0.507821	0.377829
2017-06-12	6.33758	1.10324	-0.0637528	-0.296906	-1.09789	-0.574093
2017-06-13	-9.77057	-0.624617	0.7908	1.4307	1.08025	1.45189
2017-06-14	0.514103	-1.19701	-2.75412	-0.951525	0.142679	-0.563433
2017-06-15	1.6228	-0.861032	0.208934	-0.983652	-2.64624	0.34062
2017-06-16	-5.56334	0.657027	-0.266887	0.137836	-0.765448	-0.435211
2017-06-19	-1.36898	-0.109215	-1.21441	0.526618	0.568546	0.674171
2017-06-20	3.65022	-1.54823	-0.0543762	-0.618488	-2.47249	0.307104
2017-06-21	-1.55001	-0.919252	-1.59241	0.275356	0.495716	0.761129
2017-06-22	-3.47143	-0.486413	0.698135	2.10868	-0.833	-0.945853
2017-06-23	-5.59397	-0.0542238	0.344431	1.73492	-0.191245	0.659958
2017-06-26	-2.53092	-0.412681	1.05179	-0.154474	-0.815719	1.47374
2017-06-27	9.96085	1.4367	1.27289	-0.642519	0.256801	0.137603
2017-06-28	-9.81857	-0.441558	0.933401	1.28094	1.72402	-0.692272
2017-06-29	11.5194	0.765645	0.397938	-1.05891	-0.666762	0.348301
2017-06-30	-2.17885	-0.842631	3.02493	-0.0221803	2.39331	0.561468
2017-07-03	-0.559703	1.25227	1.08822	0.199446	1.05861	0.270936
2017-07-04	-0.793038	0.0598846	-0.11294	0	-0.620159	-0.115626
2017-07-05	-2.15605	-1.71139	-2.87669	-1.71937	0.416864	1.04355
2017-07-06	11.5389	0.753979	0.845744	-1.42908	0.00618354	0.674819
2017-07-07	-11.1355	-1.80817	-1.96528	1.36149	-0.742504	0.497211
2017-07-10	-2.28922	-0.0889149	0.314254	0.0225352	0.196318	-0.31533
2017-07-11	-2.93412	-0.00152114	1.25038	0.427207	-0.253531	-0.488359
2017-07-12	-6.58044	0.641673	0.0553667	2.06513	0.756425	0.141262
2017-07-13	-5.31926	-0.441562	1.35162	-0.396389	0.142178	-0.0837832
2017-07-14	-5.34254	0.239832	0.469514	0.87874	0.925102	0.361893
2017-07-17	1.82422	0.0155432	-1.05103	0.414712	0.43305	-2.72078
2017-07-18	-0.101582	-0.189179	0.962339	0.975406	0.0564912	0.582559
2017-07-19	-1.95893	0.426084	1.04656	2.07073	-0.767011	1.72345
2017-07-20	-3.26188	0.0553419	-0.673445	0.0633647	0.487567	0.937247
2017-07-21	-3.54366	-1.4316	-1.46789	-0.274871	-1.48511	0.095034
2017-07-24	-0.52972	-0.499162	1.61989	0.169241	-0.688753	0.339622
2017-07-25	-1.04318	0.792601	2.53354	-0.0634317	1.69912	-0.320353
2017-07-26	0.705908	0.238582	1.5978	0.0211484	1.31459	-0.106861
2017-07-27	4.24948	1.05137	-0.0877014	-1.21265	-7.45456	0.0375054
2017-07-28	1.1728	0.259314	1.18342	1.14919	0.981653	0.889917
2017-07-31	-1.0837	0.40098	0.498729	-0.21182	-1.42456	0.79
2017-08-01	-2.63209	0.555356	-2.67593	0.169492	-1.87102	-0.0688447
2017-08-02	0.766558	0.641066	0.346442	-1.98831	0.29824	-0.189605
2017-08-03	0.721526	-0.137093	-0.994074	-0.108026	-0.725323	-0.373982
2017-08-04	-4.81018	-0.438265	1.20432	-0.281416	1.43581	-0.987385
2017-08-07	-2.26923	-0.0994173	-0.443169	0.970777	0.0877061	1.10855
2017-08-08	8.77357	0.768448	-0.629334	-1.536	0.714396	-0.1921
2017-08-09	1.21603	-0.20601	1.01871	0.500164	-0.375708	0.508807
2017-08-10	36.0468	2.15776	-1.81708	-2.81585	-1.76653	-0.430961
2017-08-11	-0.952352	-1.09217	1.34017	0.066912	0.680479	-1.78868
2017-08-14	-23.2967	-2.01042	-2.15338	1.35092	0.00483963	1.66347
2017-08-15	-4.70193	-1.12663	0.60226	-0.0219998	-1.5497	0.456507
2017-08-16	-3.51736	-0.640675	-1.29707	-0.5737	1.87342	-0.510068
2017-08-17	27.1619	1.85247	0.581906	-2.01169	-4.86114	0.626786
2017-08-18	-6.94848	-0.564655	3.04789	0.473027	1.0923	-0.327305
2017-08-21	-8.71294	-0.821712	-2.17964	-1.26641	-0.530495	0.690354
2017-08-22	-16.1796	-0.958044	0.861417	0.838532	-1.04851	0.0954695
2017-08-23	5.71015	0.823953	0.802194	0.382926	0.0902866	-0.633048
2017-08-24	-0.369579	0.0193226	-2.09938	0.91754	-1.38033	-0.461137
2017-08-25	-8.74004	-0.0906147	0.492164	-0.0891464	0.839939	0.887791
2017-08-28	-1.03062	0.00057918	-2.82861	0.178213	0.325349	0.947383
2017-08-29	2.48712	-0.0523226	-0.111318	0.222321	-0.268496	-0.30709
2017-08-30	-4.6981	-0.436041	-0.945761	0.55365	-0.381981	0.163208
2017-08-31	-6.875	-0.314832	2.59224	0.704228	1.05029	0.120384
2017-09-01	-5.78049	0.311652	-0.483219	0.82988	0.53902	0.60196
[truncated: 280 more rows]
